# Supplementary material for: The hydroboration reaction as a key for a straightforward synthesis of new MRI-NCT agents
Source: Royal Society of Chemistry journal article supplement (doi:10.1039/c4ob02291b), 2015-01-01

**The Hydroboration Reaction as a Key for a Straightforward Synthesis  
of New MRI-NCT agents**

Paolo Boggio, Antonio Toppino, Simonetta Geninatti-Crich, Diego Alberti, Domenica Marabello,  
Claudio Medana, Cristina Prandi, Paolo Venturello, Silvio Aime, Annamaria Deagostino.

**Table of contents**

|                                                                                                                                                                                                        |    |
|--------------------------------------------------------------------------------------------------------------------------------------------------------------------------------------------------------|----|
| <b>Figure 1</b> $^1\text{H}$ , $^{13}\text{C}$ , DEPT, $^{11}\text{B}$ of hexadecyldecaborane ( <b>3</b> )                                                                                             | 2  |
| <b>Figure 2</b> $^1\text{H}$ , $^{13}\text{C}$ , DEPT, $^{11}\text{B}$ of <i>C</i> -(2-hydroxy)-ethyl- <i>C'</i> -H-4-(hexadecyl)- <i>ortho</i> -carborane ( <b>5a</b> )                               | 4  |
| <b>Figure 3</b> $^1\text{H}$ , $^{13}\text{C}$ , DEPT, $^{11}\text{B}$ of <i>C</i> -(2-hydroxy)-ethyl- <i>C'</i> -H-9-(hexadecyl)- <i>ortho</i> -carborane ( <b>5b</b> )                               | 6  |
| <b>Figure 4</b> $^1\text{H}$ , $^{13}\text{C}$ , DEPT of <i>C</i> -(carboxymethyl)- <i>C'</i> -H-4-(hexadecyl)- <i>o</i> -carborane ( <b>6a</b> )                                                      | 8  |
| <b>Figure 5</b> $^1\text{H}$ , $^{13}\text{C}$ , DEPT of <i>C</i> -(carboxymethyl)- <i>C'</i> -H-9-(hexadecyl)- <i>o</i> -carborane ( <b>6b</b> )                                                      | 10 |
| <b>Figure 6</b> $^1\text{H}$ , $^{13}\text{C}$ , DEPT of <i>C</i> -[ <i>ter</i> -butylDOTAMA- $\text{C}_6$ ]-acetamido- <i>C'</i> -H-4-(hexadecyl)- <i>o</i> -carborane ( <b>7a</b> )                  | 12 |
| <b>Figure 7</b> $^1\text{H}$ , $^{13}\text{C}$ , DEPT, $^{11}\text{B}$ of <i>C</i> -[ <i>ter</i> -butylDOTAMA- $\text{C}_6$ ]-acetamido- <i>C'</i> -H-9-(hexadecyl)- <i>o</i> -carborane ( <b>7b</b> ) | 14 |
| <b>Figure 8</b> $^1\text{H}$ , $^{13}\text{C}$ , DEPT of <i>C</i> -[benzylDOTAMA- $\text{C}_6$ ]-acetamido- <i>C'</i> -H-4-(hexadecyl)- <i>o</i> -carborane ( <b>8a</b> )                              | 16 |
| <b>Figure 9</b> $^1\text{H}$ , $^{13}\text{C}$ , DEPT of <i>C</i> -[benzylDOTAMA- $\text{C}_6$ ]-acetamido- <i>C'</i> -H-9-(hexadecyl)- <i>o</i> -carborane ( <b>8b</b> )                              | 18 |
| <b>Figure 10</b> $^1\text{H}$ , $^{13}\text{C}$ , DEPT of <i>C</i> -[DOTAMA- $\text{C}_6$ ]-acetamido- <i>C'</i> -H-4-(hexadecyl)- <i>o</i> -carborane ( <b>9a</b> )                                   | 20 |
| <b>Figure 11</b> $^1\text{H}$ , $^{13}\text{C}$ , DEPT of <i>C</i> -[DOTAMA- $\text{C}_6$ ]-acetamido- <i>C'</i> -H-9-(hexadecyl)- <i>o</i> -carborane ( <b>9b</b> )                                   | 24 |
| <b>Figure 12</b> Effect of HP $\beta$ CD concentration on the $R_{1\text{obs}}$ values (21,5 MHz) for PB01a and PB01b                                                                                  | 27 |
| <b>Figure 13</b> Determination of the Critical Micellar Concentration (CMC) of PB01a and PB01b                                                                                                         | 28 |

**Figure 1**  $^1\text{H}$ ,  $^{13}\text{C}$ , DEPT,  $^{11}\text{B}$  of hexadecyldecaborane (**3**)

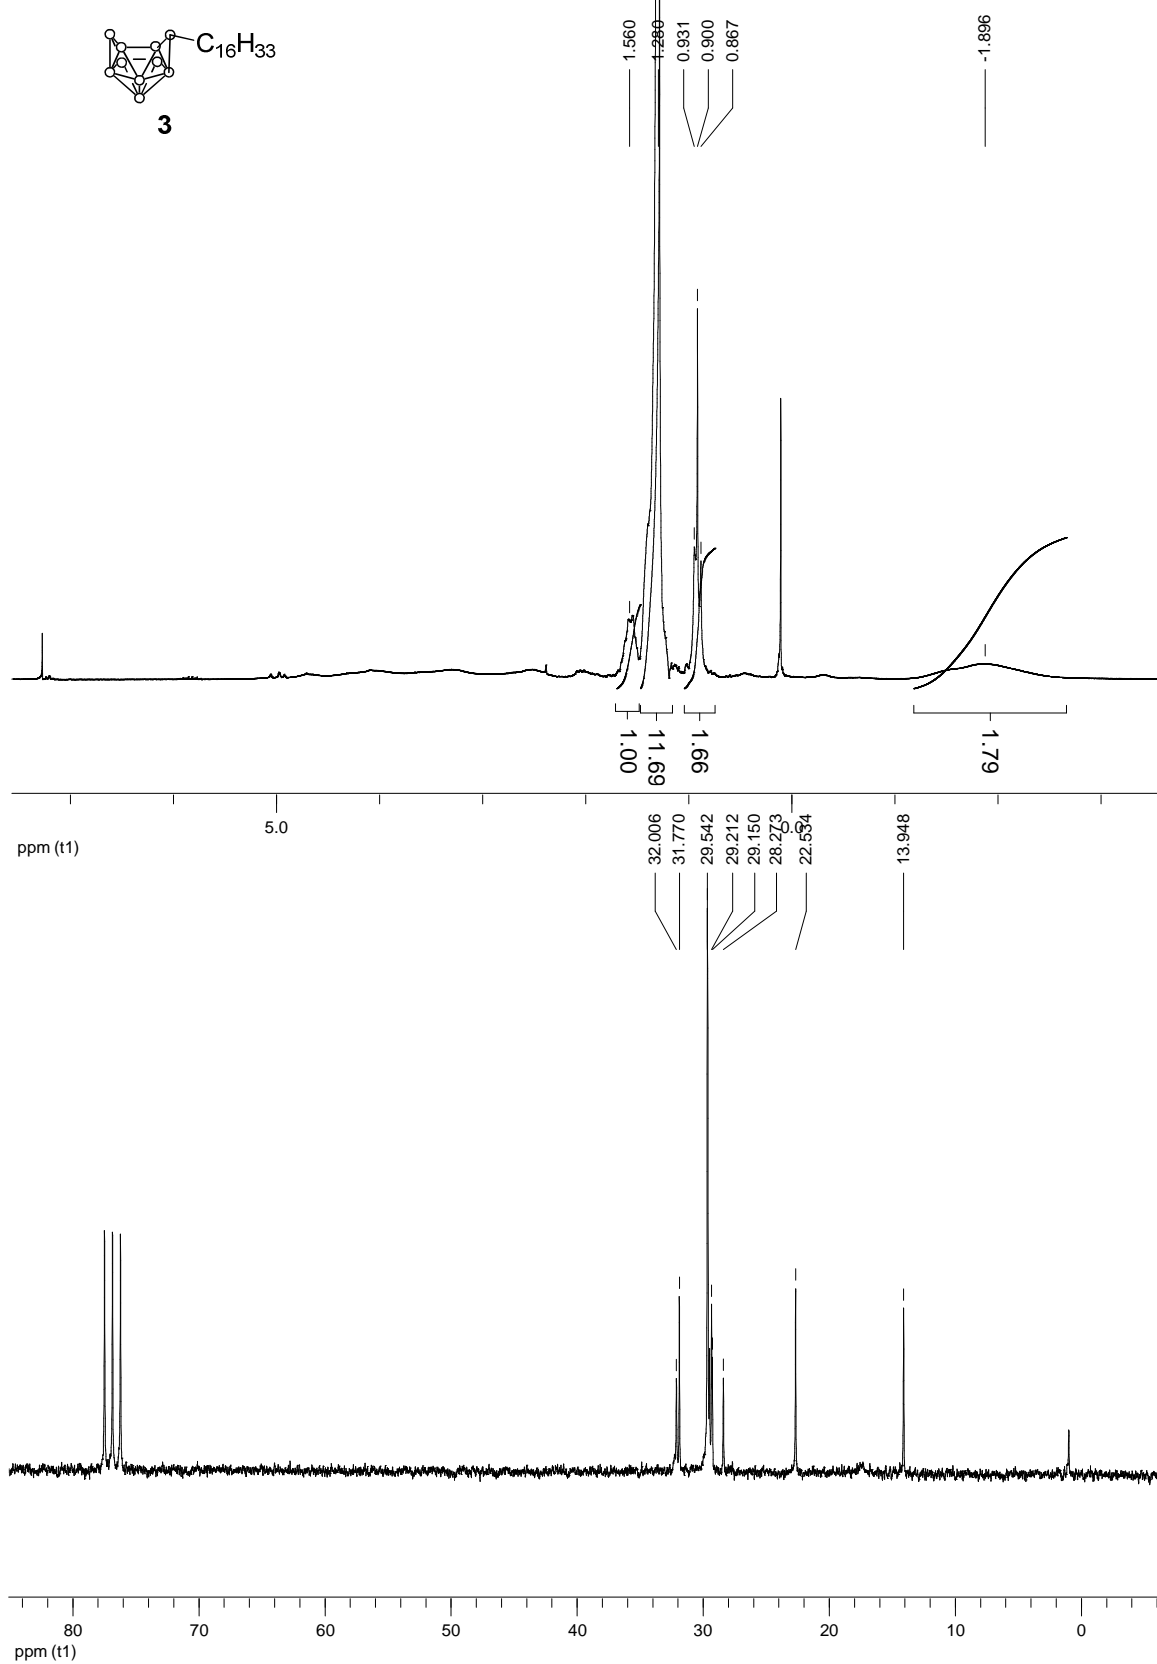

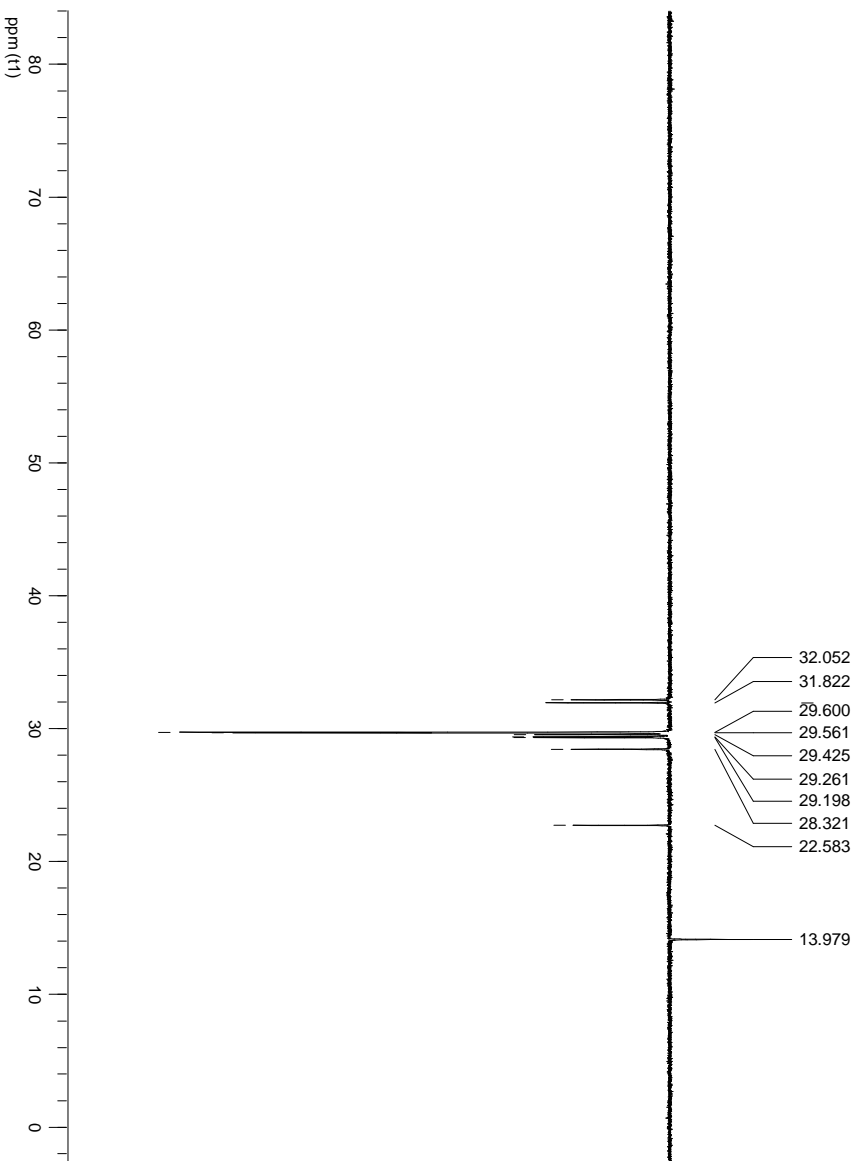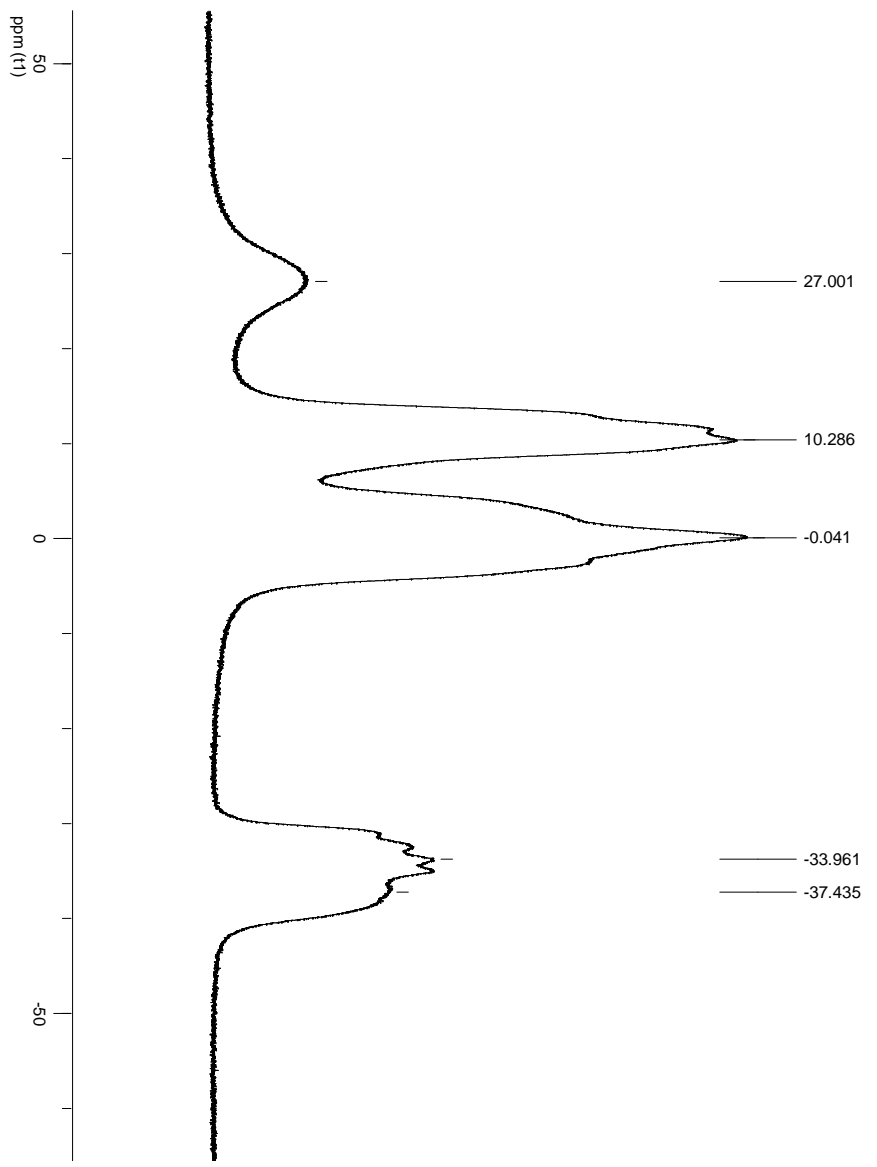

**Figure 2**  $^1\text{H}$ ,  $^{13}\text{C}$  DEPT,  $^{11}\text{B}$  of *C*-(2-hydroxy)-ethyl-*C'*-H-4-(hexadecyl)-*ortho*-carborane (**5a**)

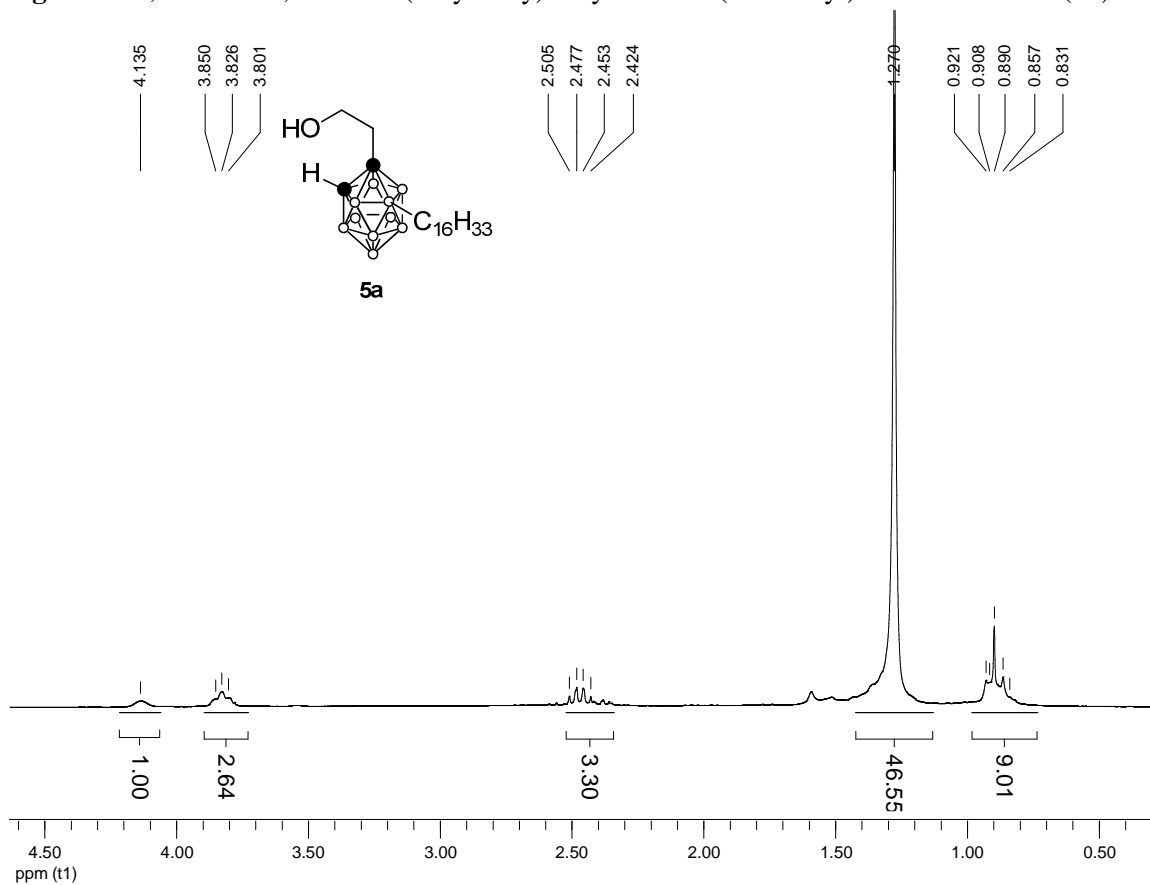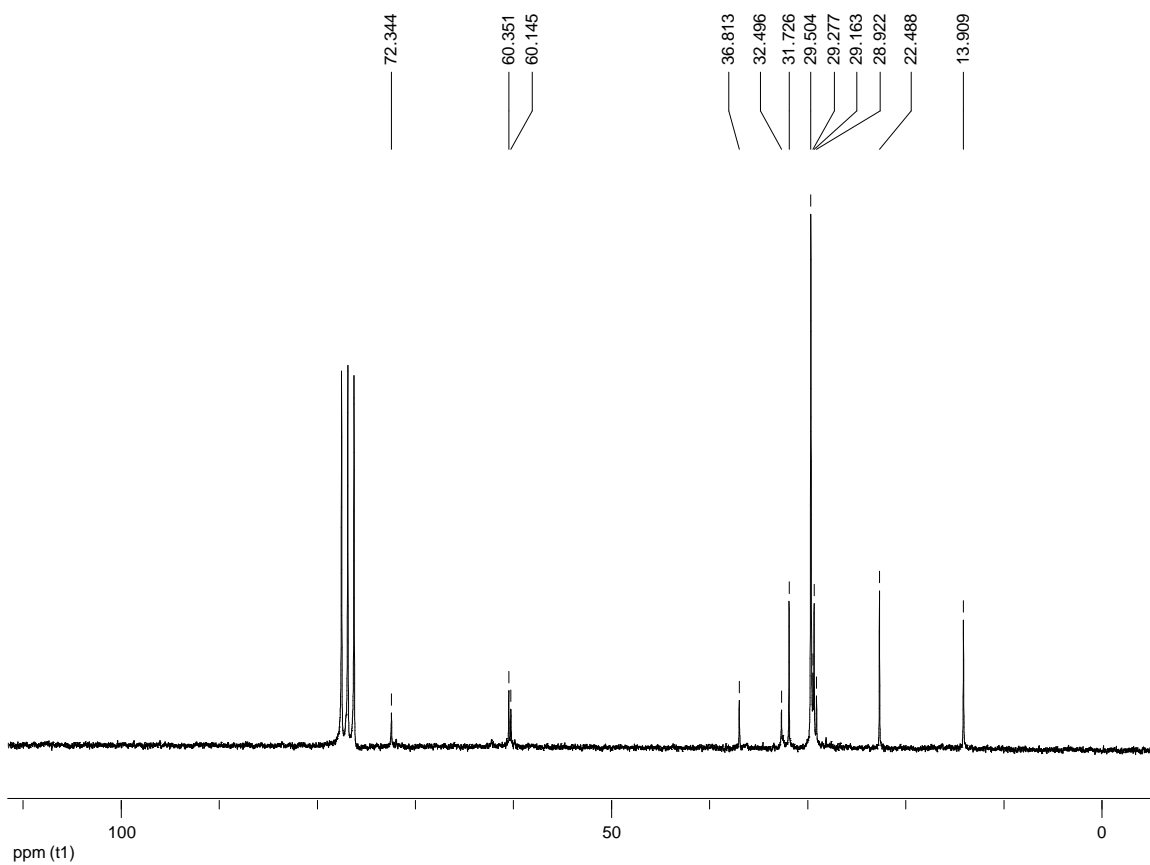

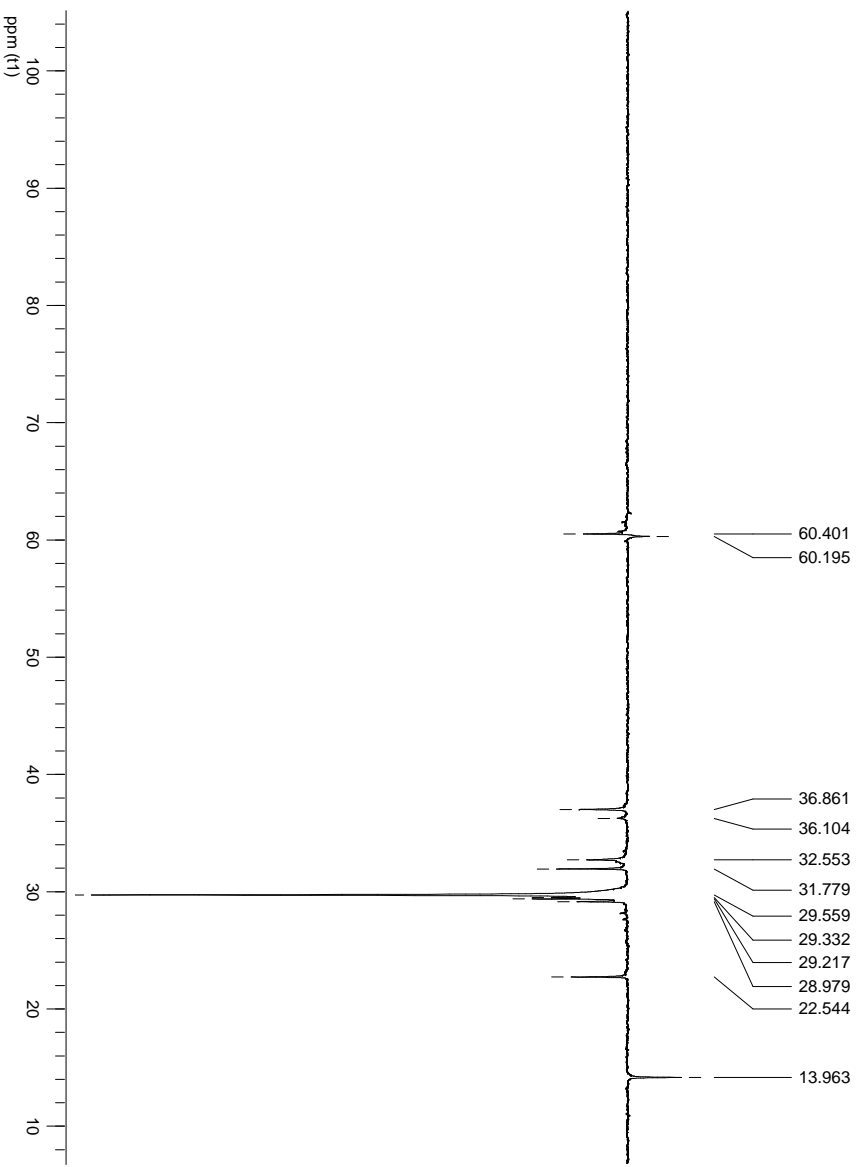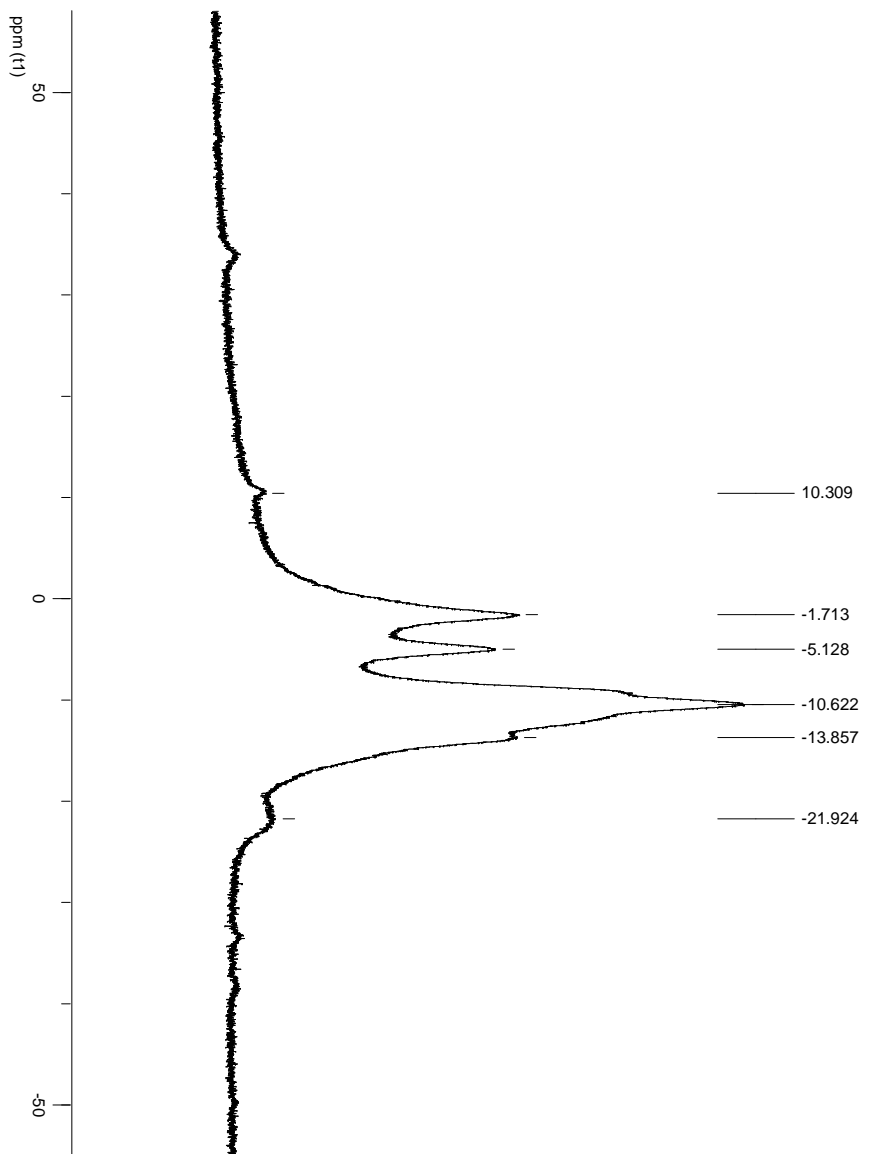

**Figure 3**  $^1\text{H}$ ,  $^{13}\text{C}$  DEPT,  $^{11}\text{B}$  of *C*-(2-hydroxy)-ethyl-*C'*-H-9-(hexadecyl)-*ortho*-carborane (**5b**)

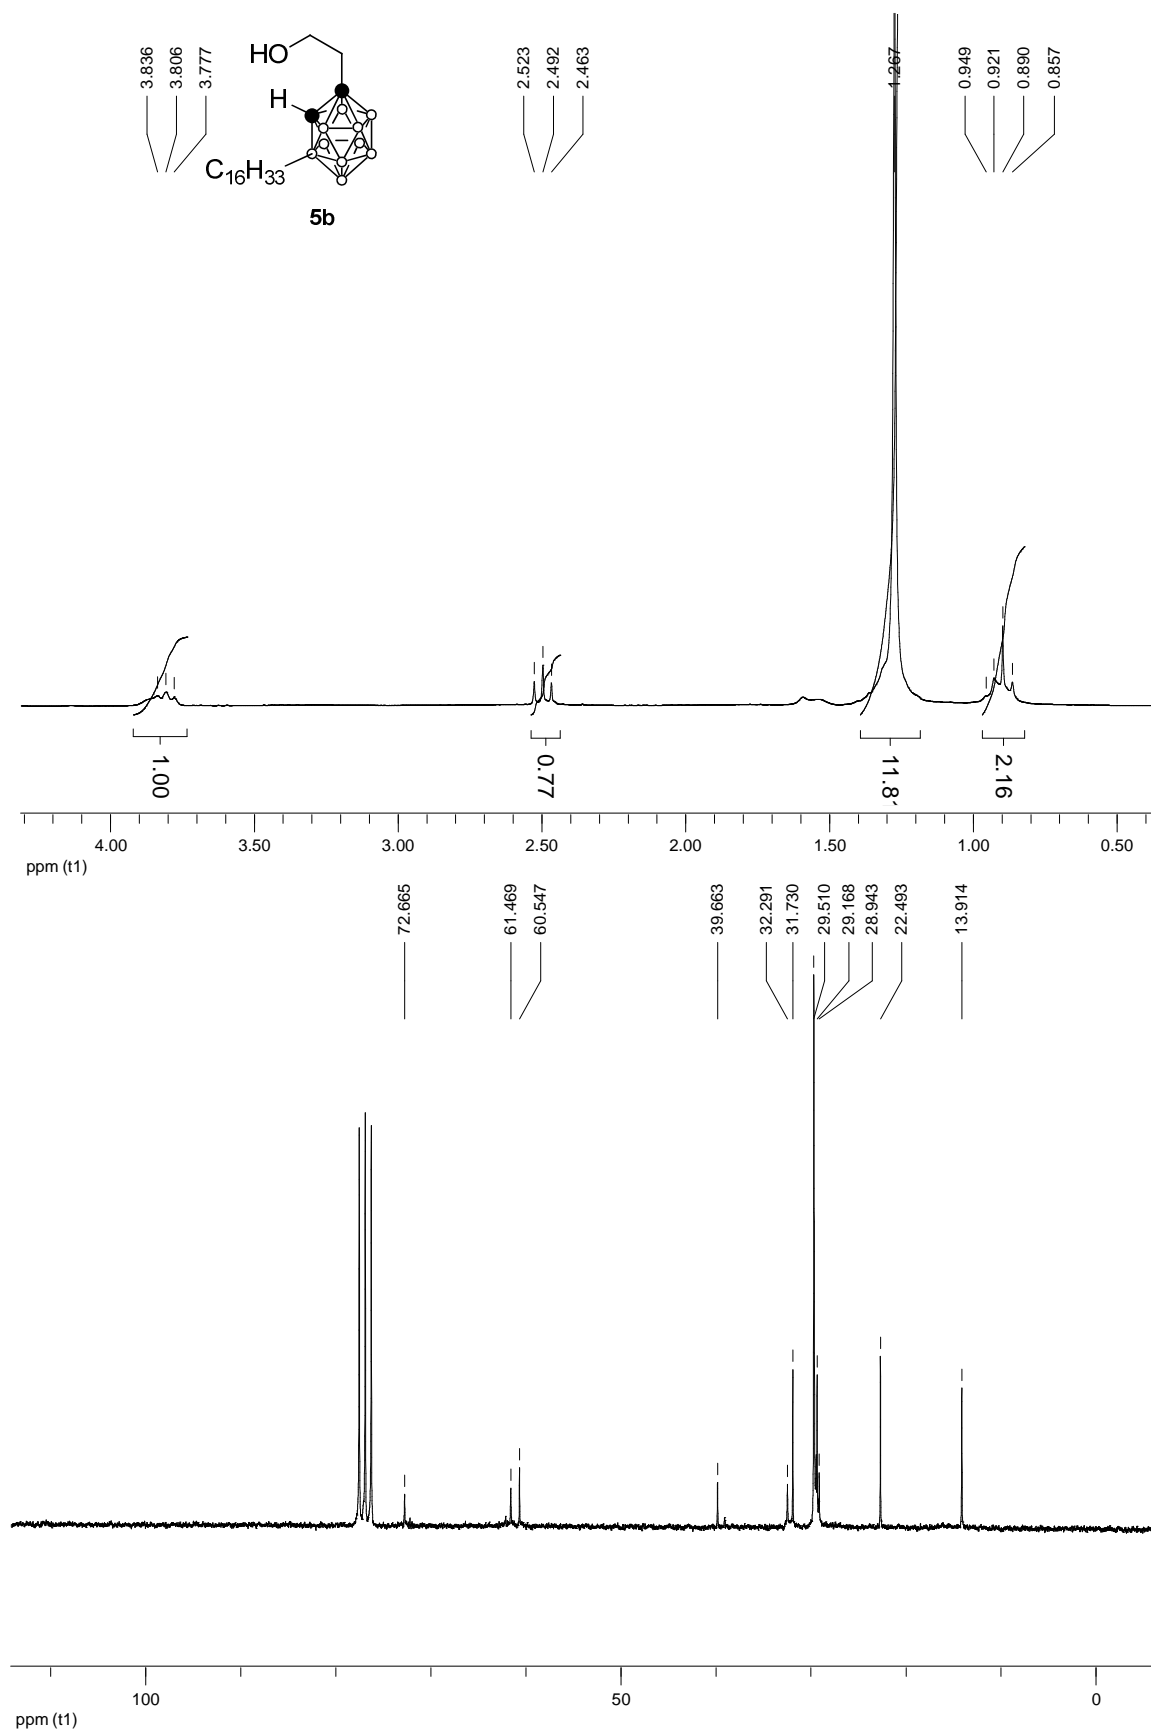

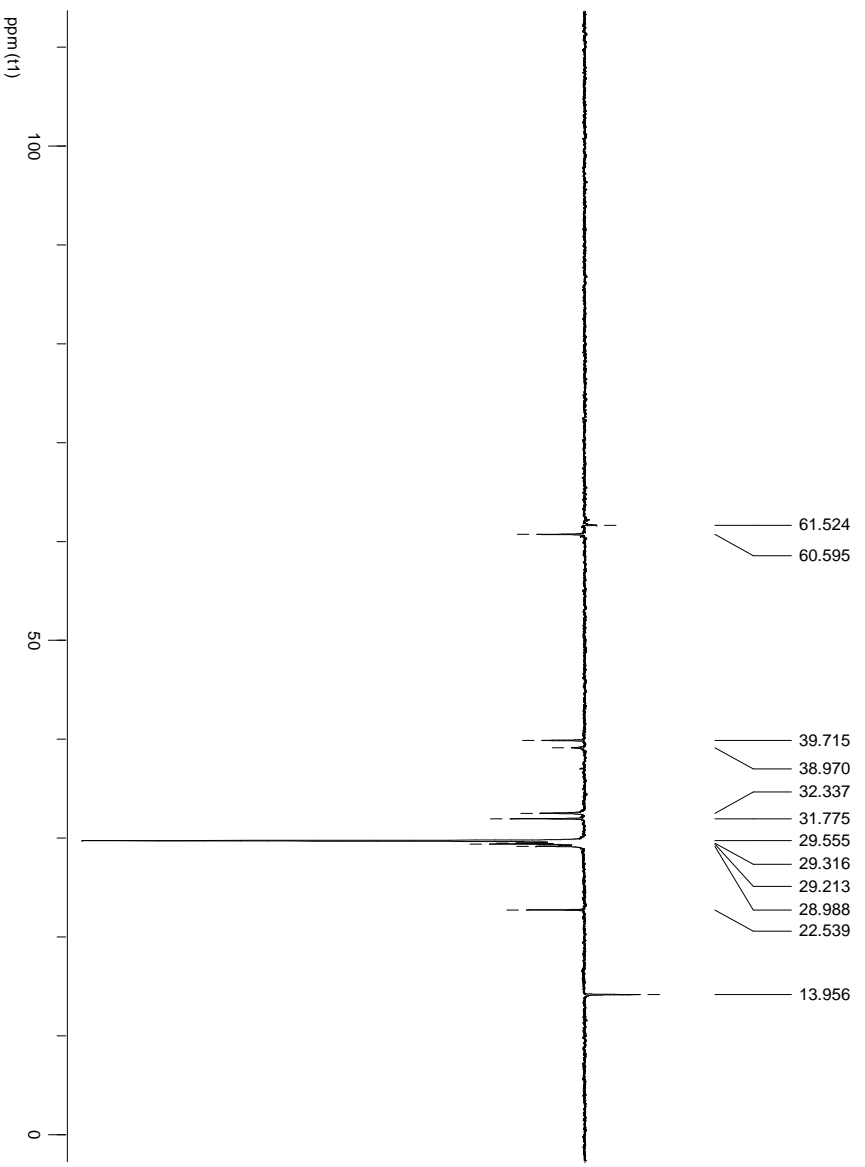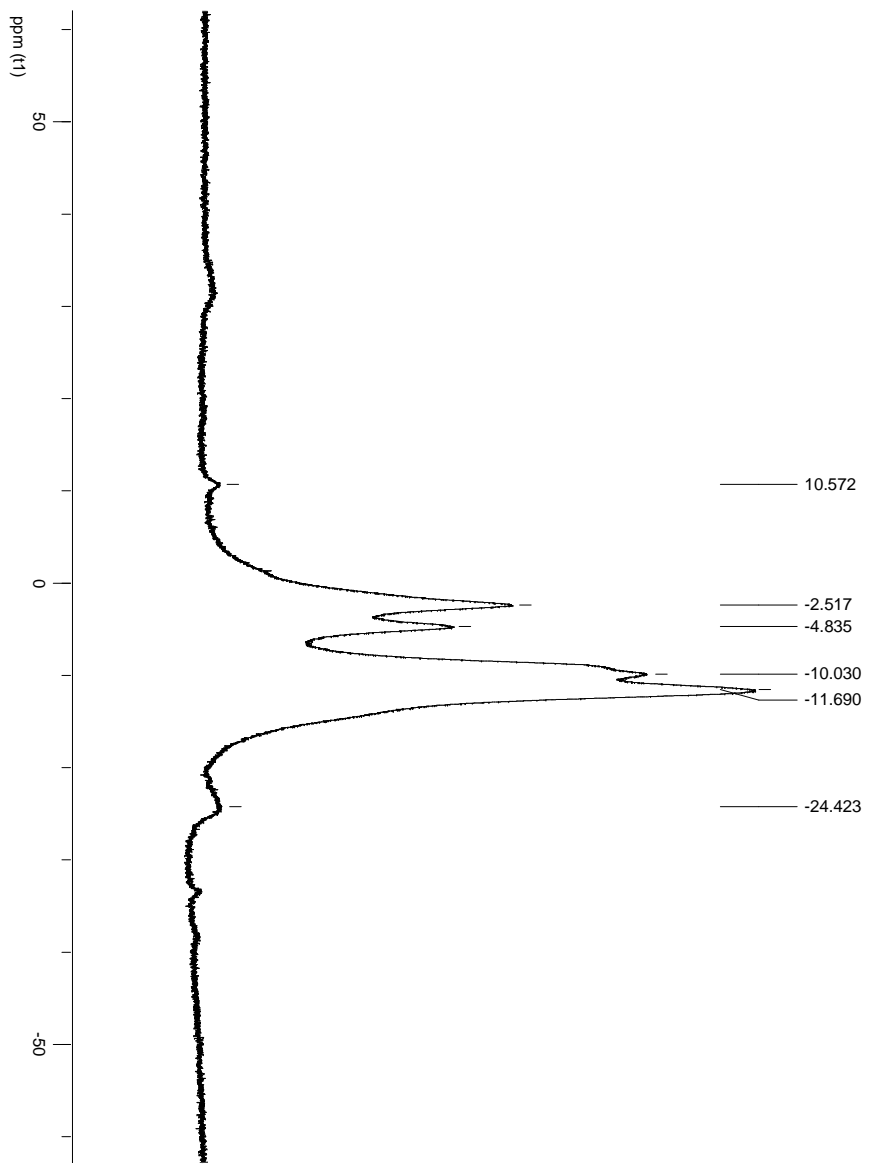

**Figure 4**  $^1\text{H}$ ,  $^{13}\text{C}$ , DEPT of *C*-(carboxymethyl)-*C'*-H-4-(hexadecyl)-*o*-carborane (**6a**)

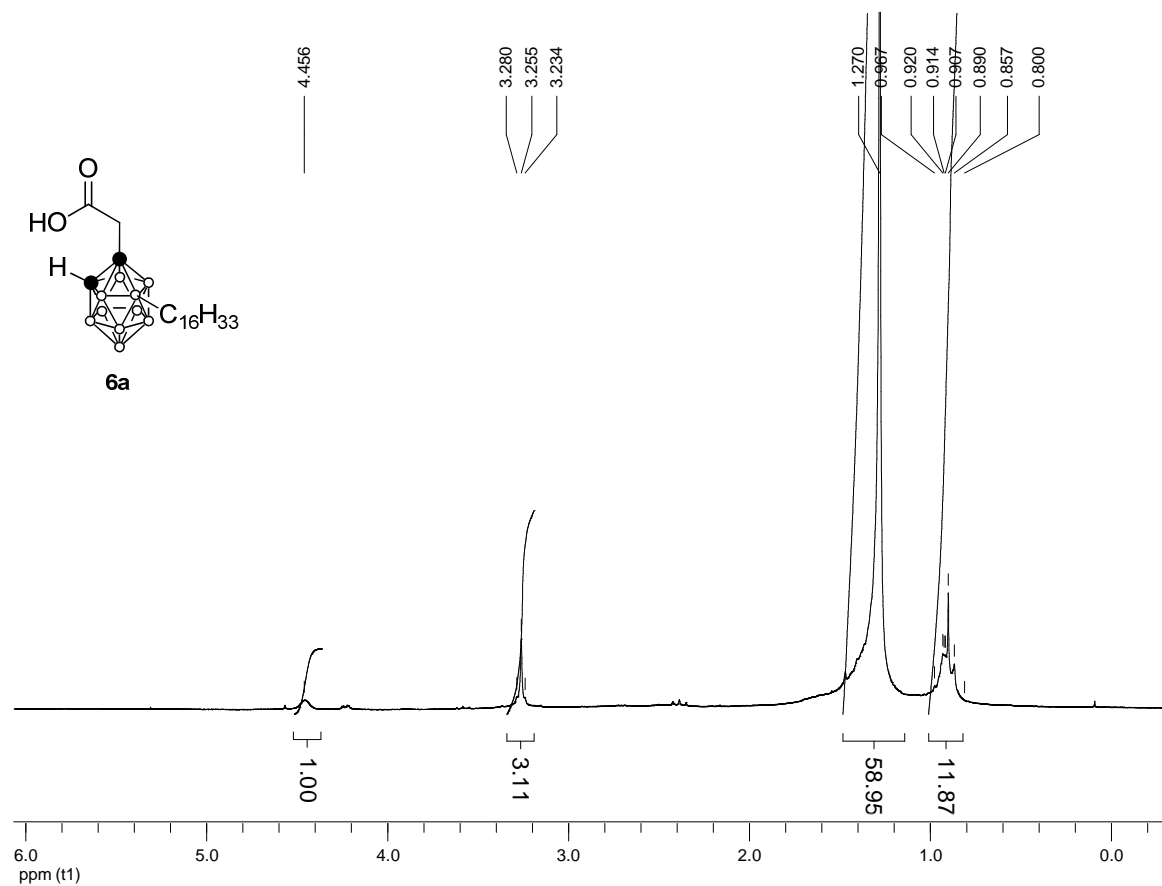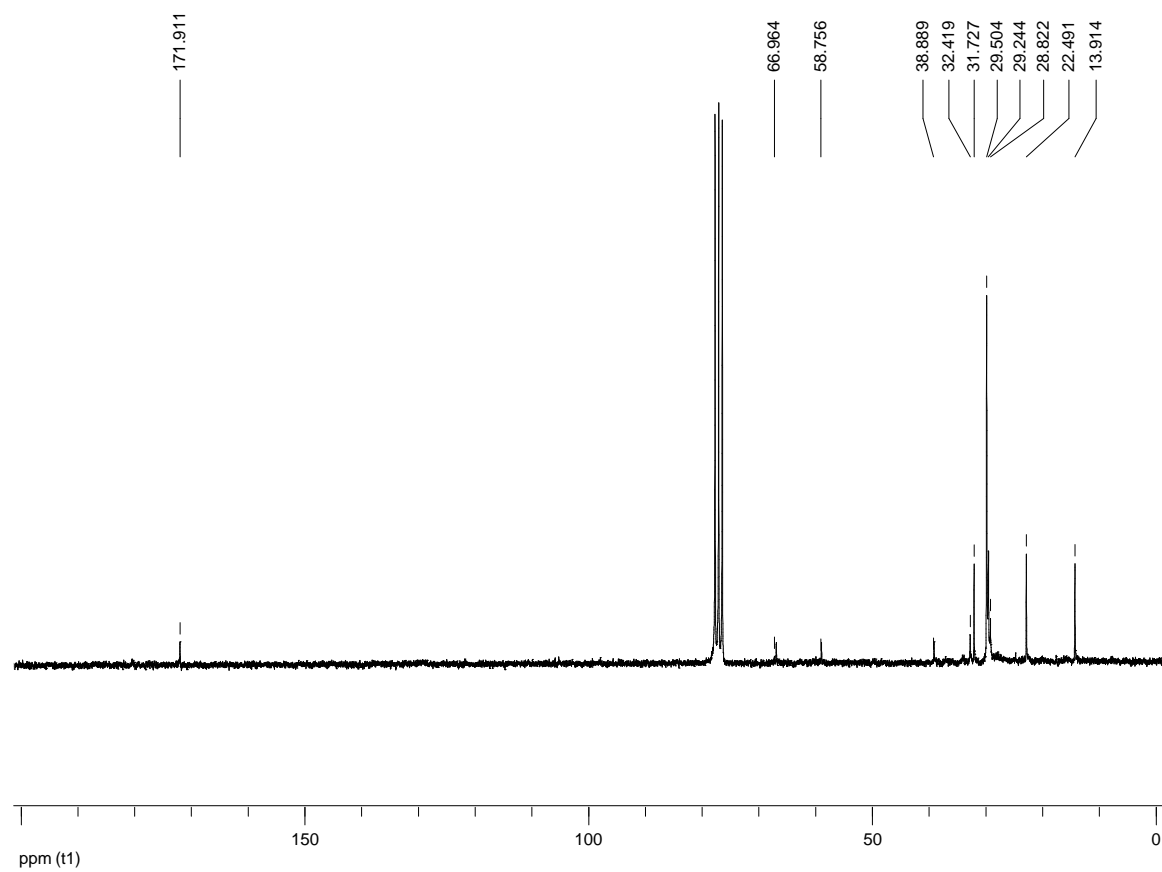



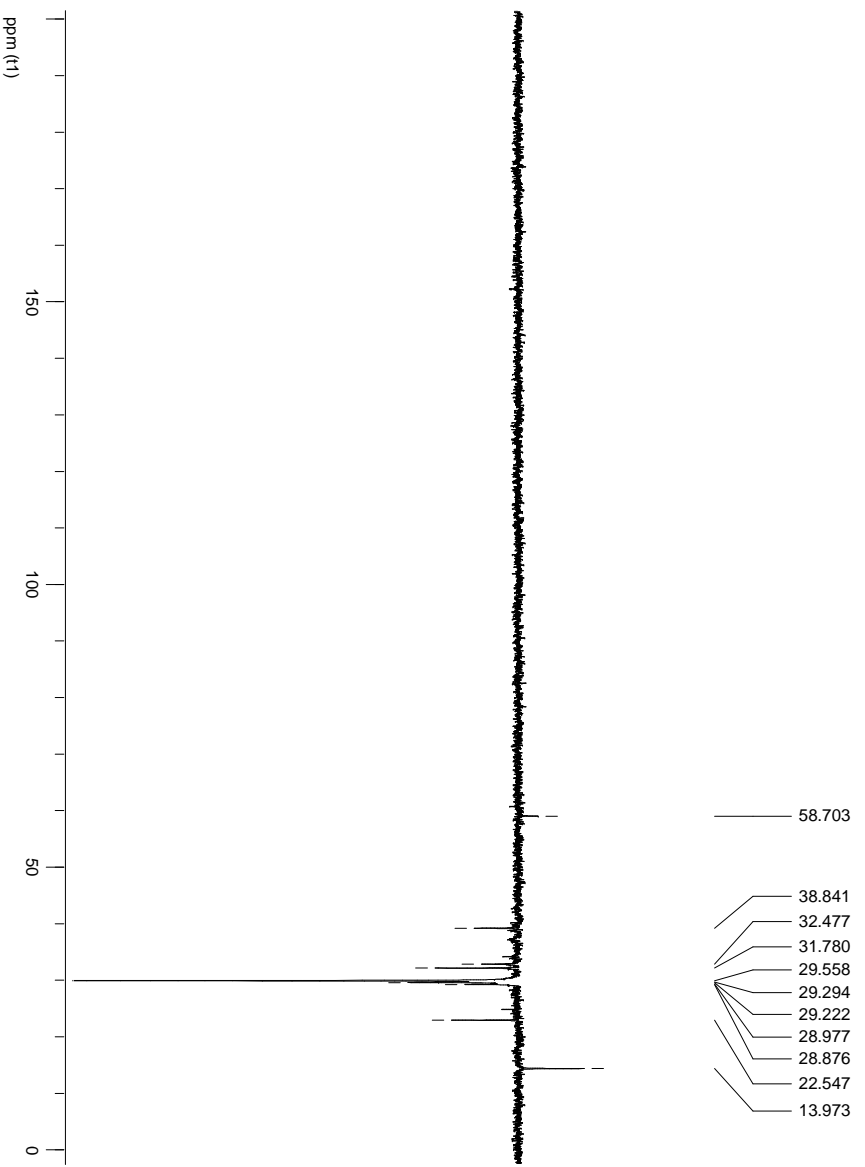

**Figure 5**  $^1\text{H}$ ,  $^{13}\text{C}$ , DEPT of *C*-(carboxymethyl)-*C'*-H-4-(hexadecyl)-*o*-carborane (**6b**)

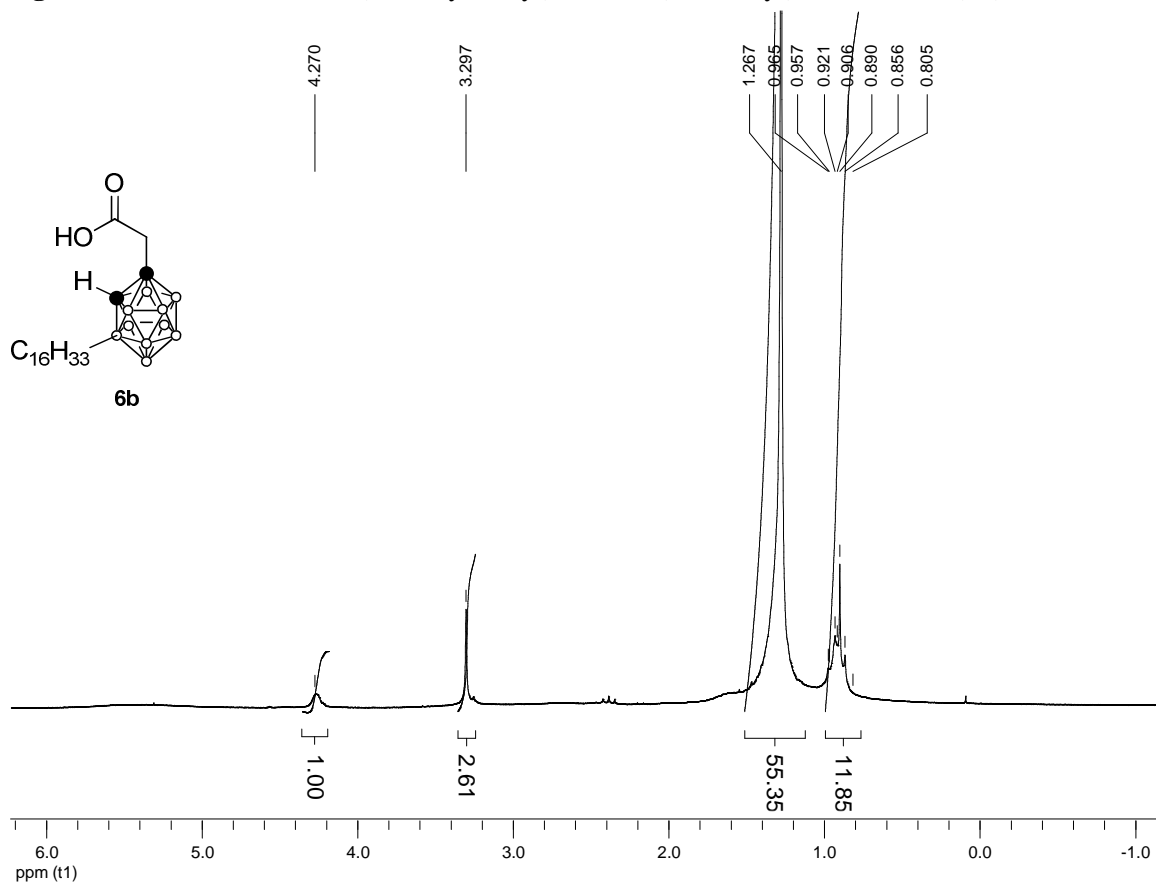

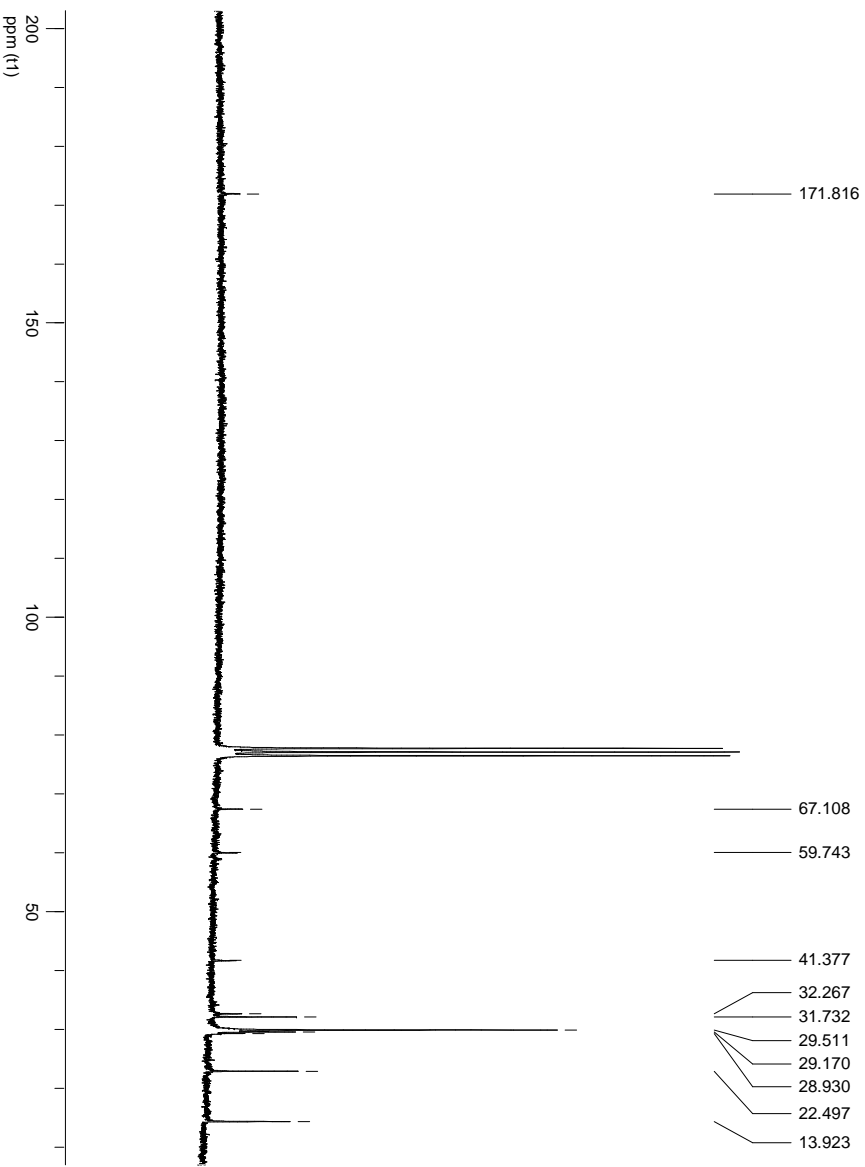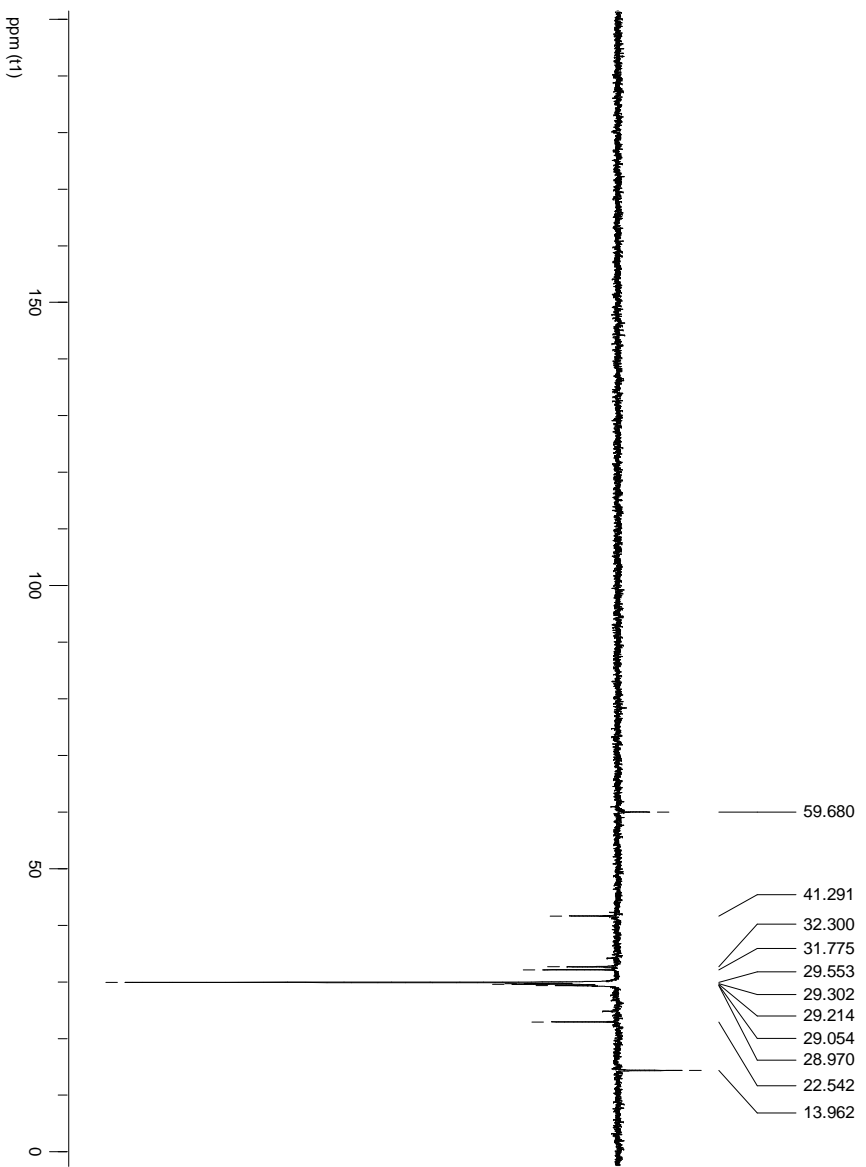

**Figure 6**  $^1\text{H}$ ,  $^{13}\text{C}$ , DEPT of C-[*tert*-butyl]DOTAMA-C<sub>6</sub>] -acetamido-C'-H-4-(hexadecyl)-*o*-carborane (**7a**)

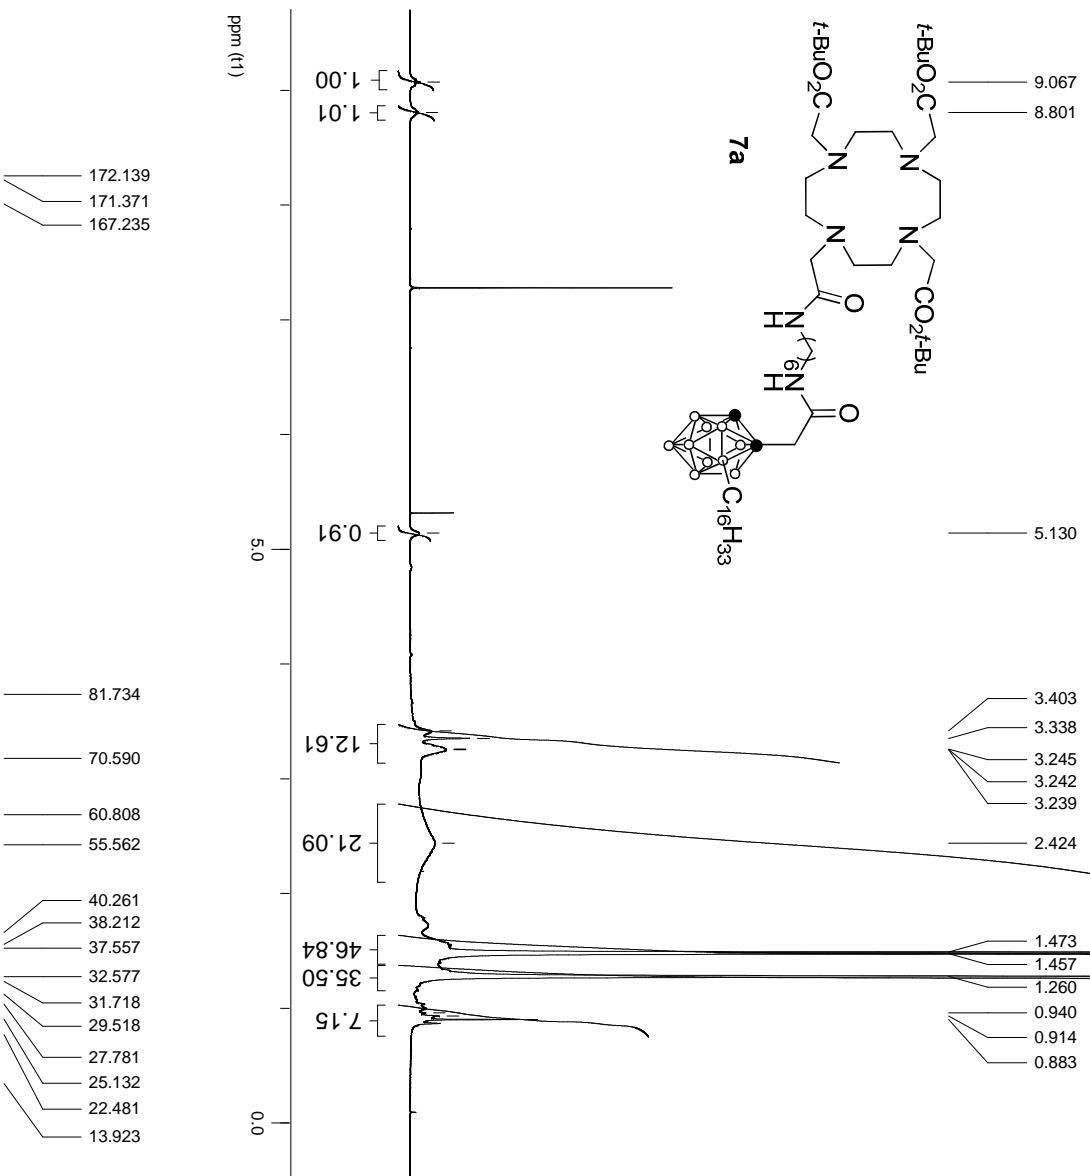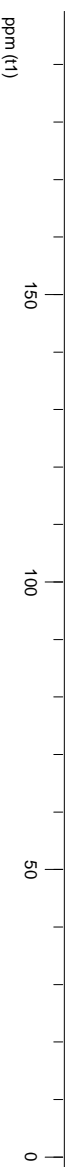

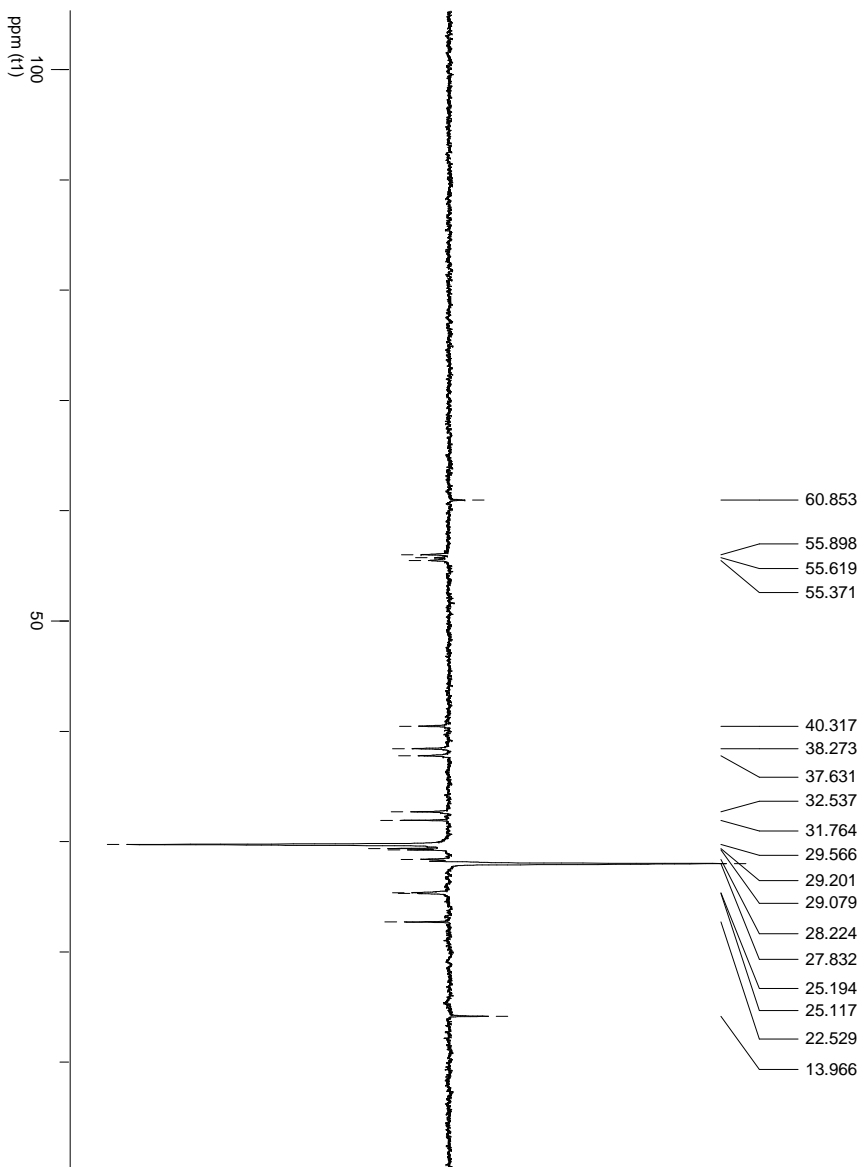

**Figure 7**  $^1\text{H}$ ,  $^{13}\text{C}$ , DEPT of  $C$ -[*tert*-butyl]DOTAMA- $C_6$ ]-acetamido- $C^*$ -H-9-(hexadecyl)-*o*-carborane (**7b**)

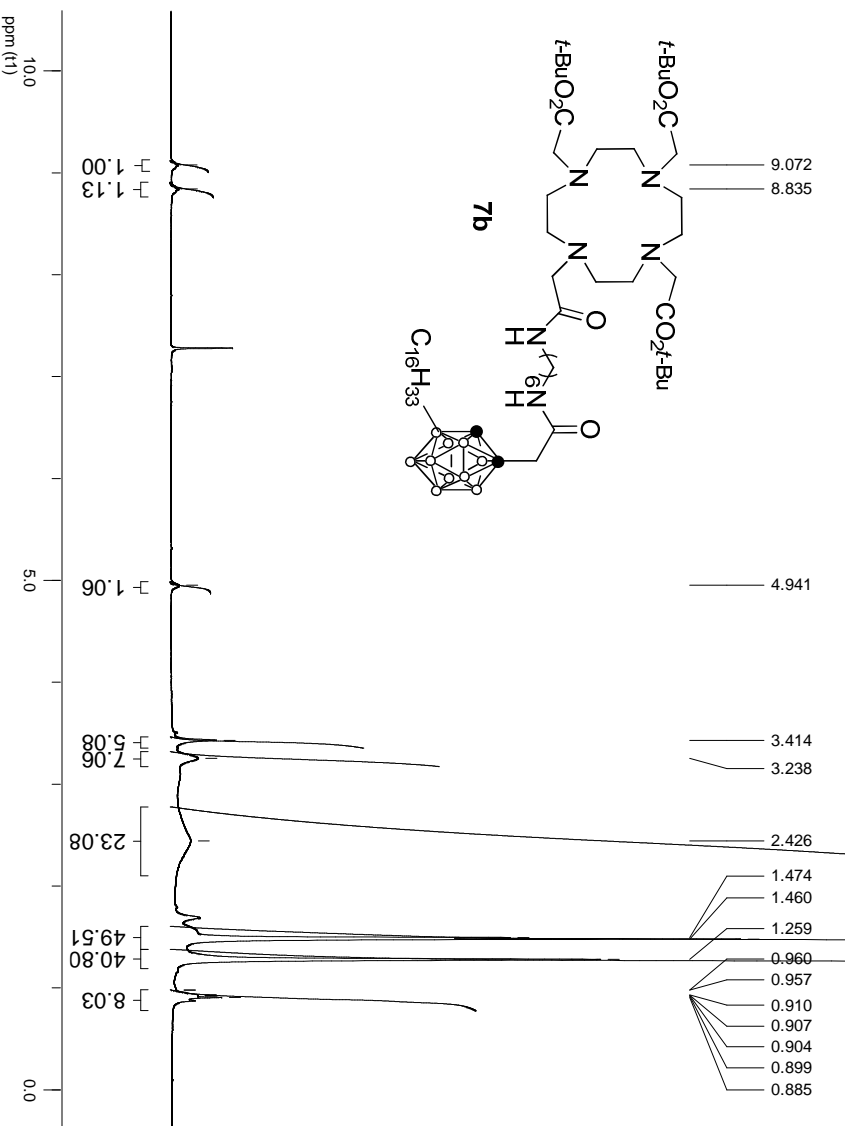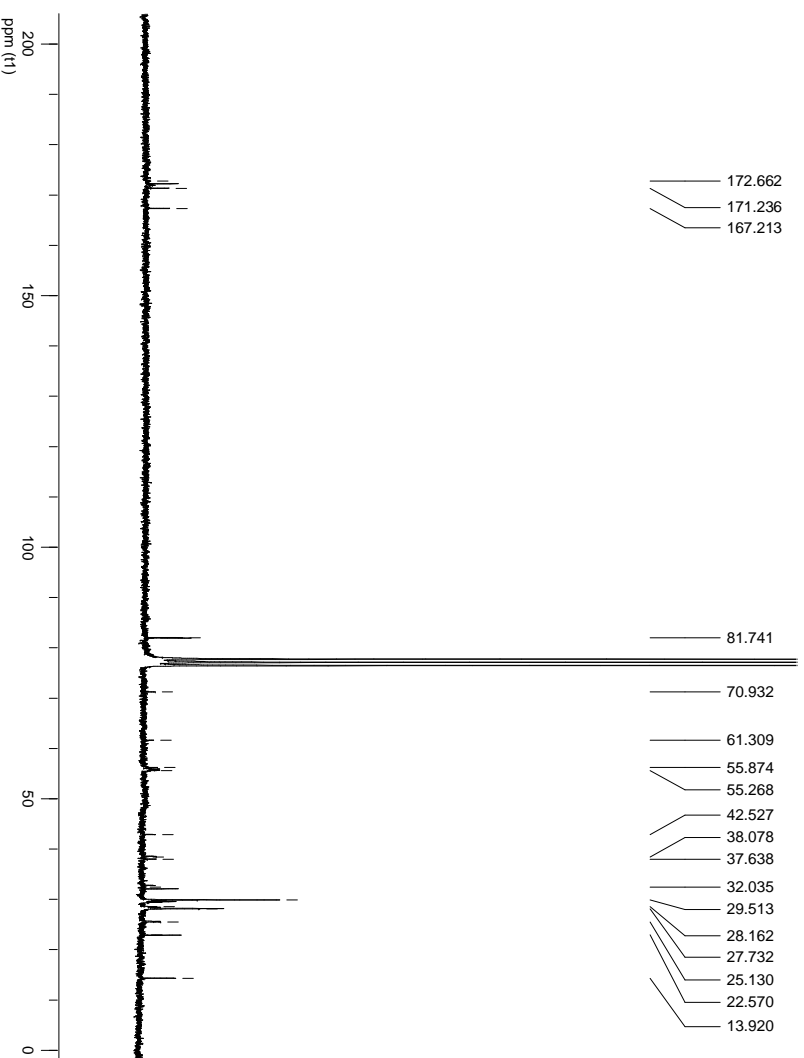

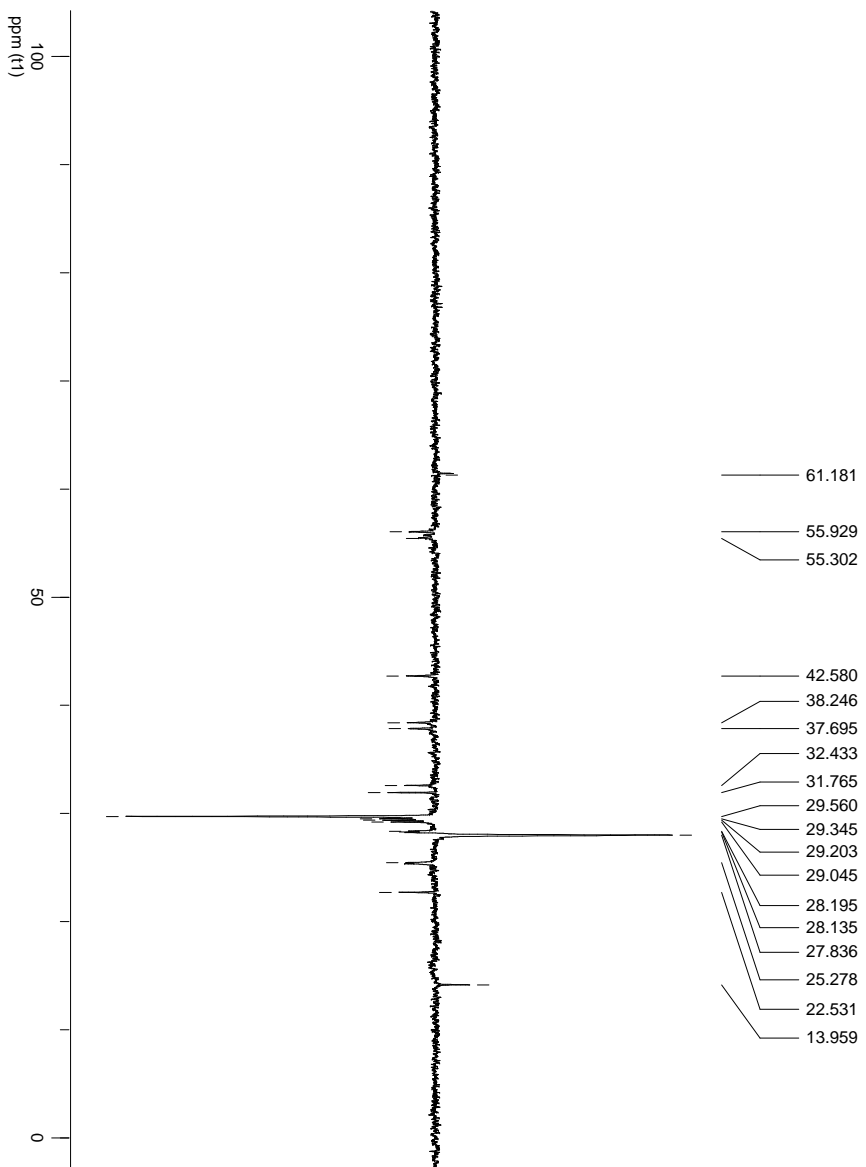

**Figure 8**  $^1\text{H}$ ,  $^{13}\text{C}$ , DEPT of C-[benzyl]DOTAMA-C<sub>6</sub>]acetamido-C'-H-4-(hexadecyl)-o-carborane (**8a**)

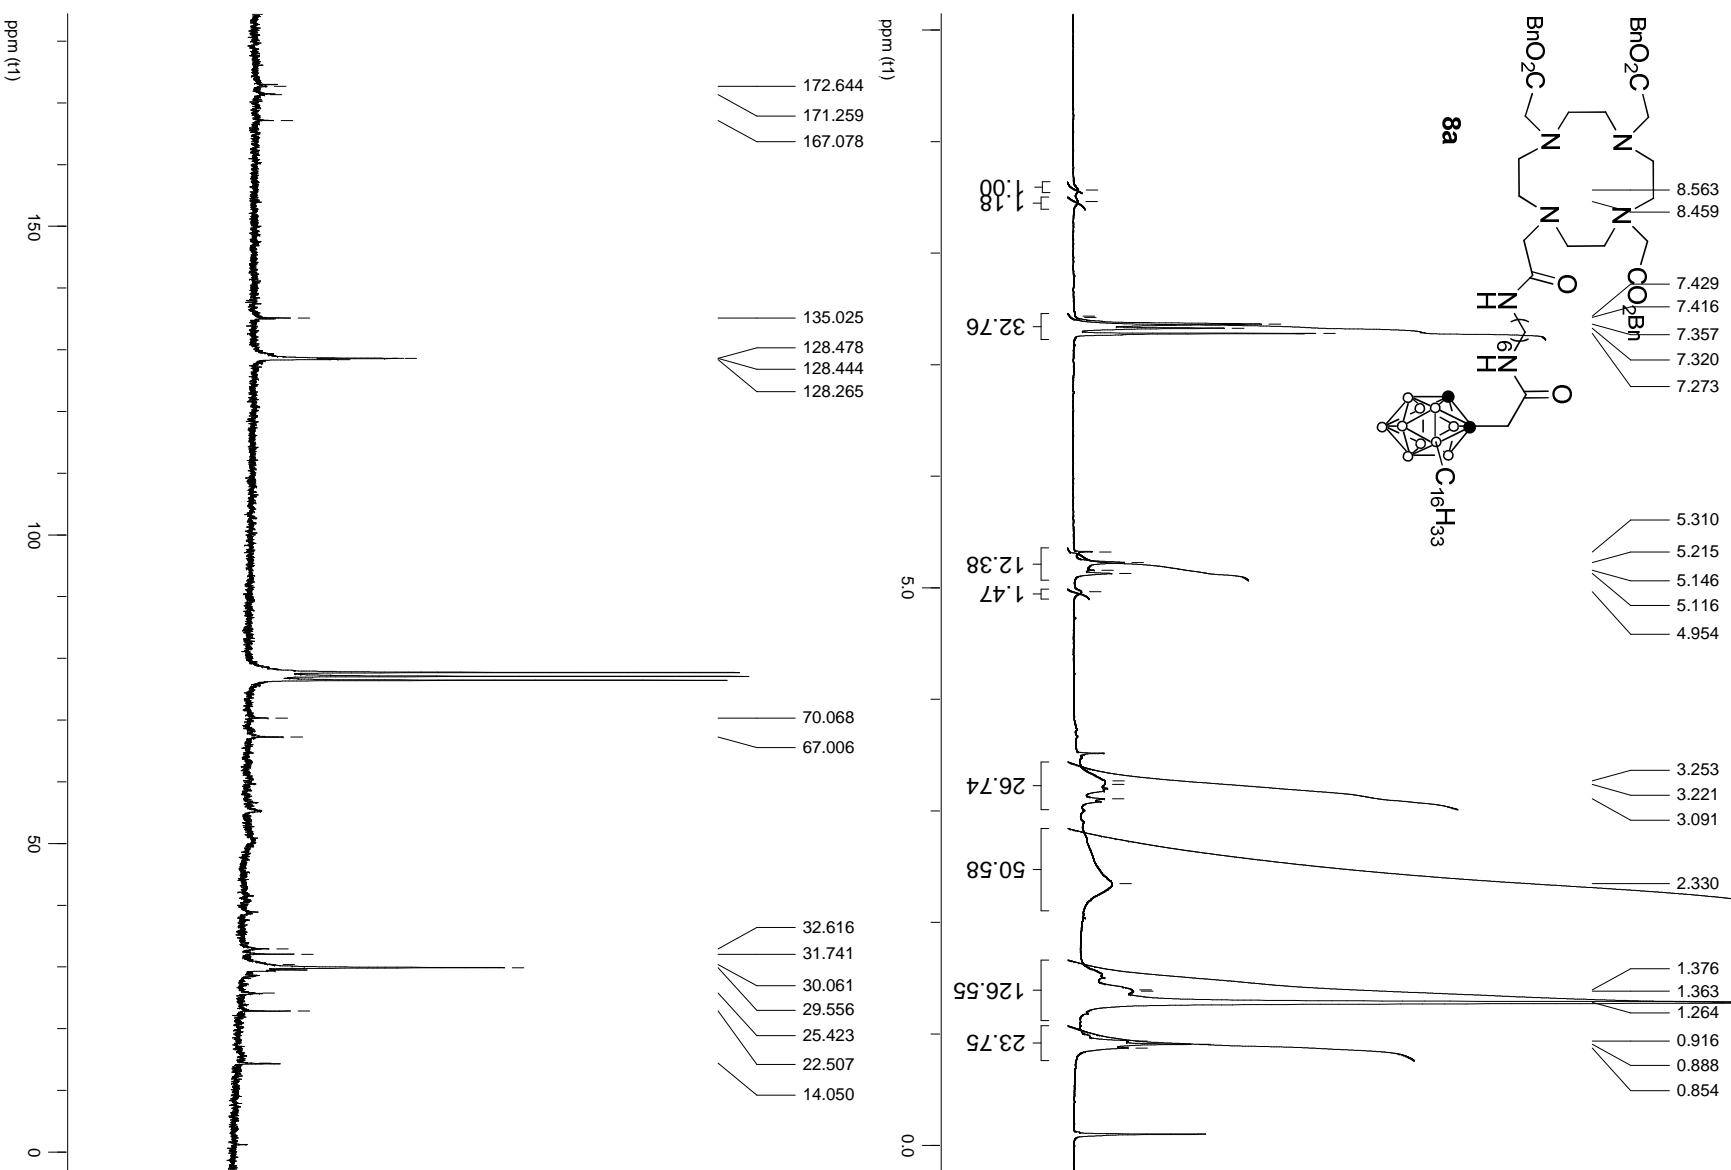



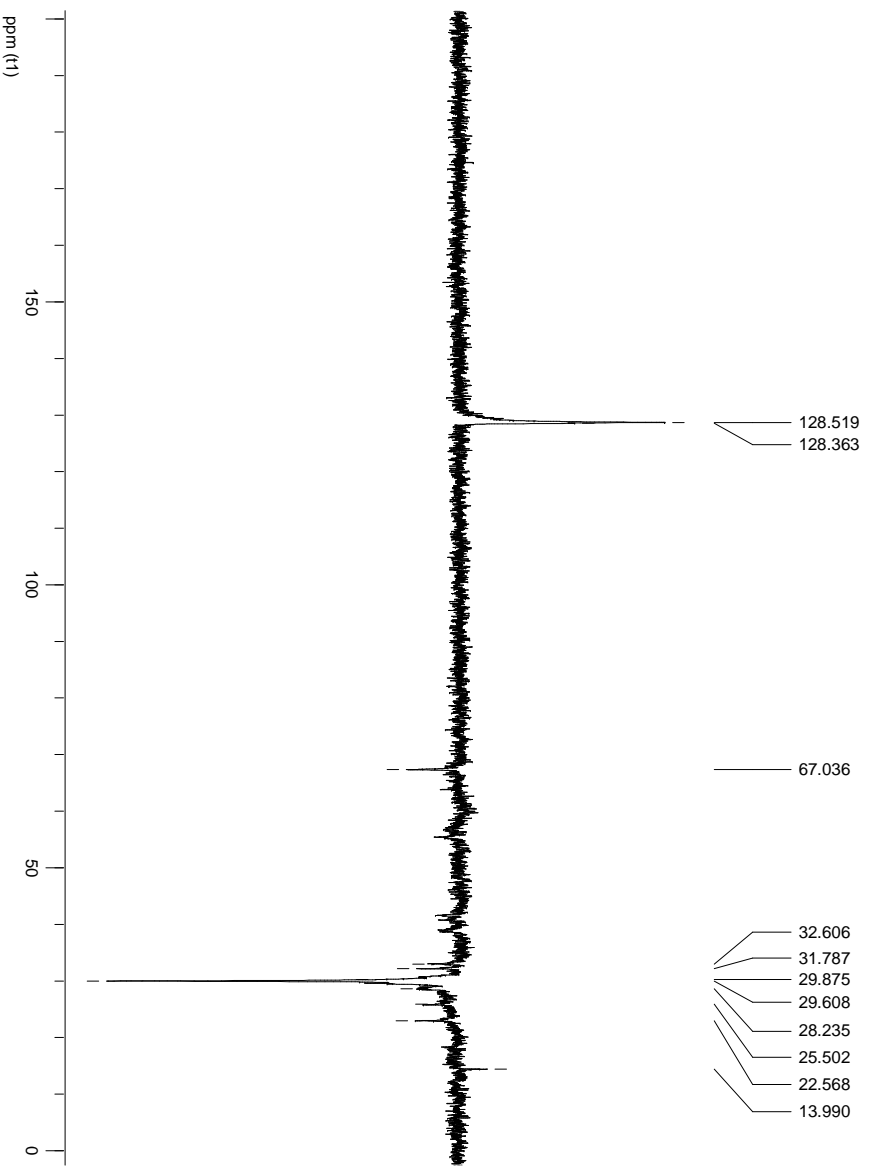

**Figure 9**  $^1\text{H}$ ,  $^{13}\text{C}$ , DEPT of C-[benzyl]DOTAMA-C<sub>6</sub>]acetamido-C'-H-9-(hexadecyl)-*o*-carborane (**8b**)

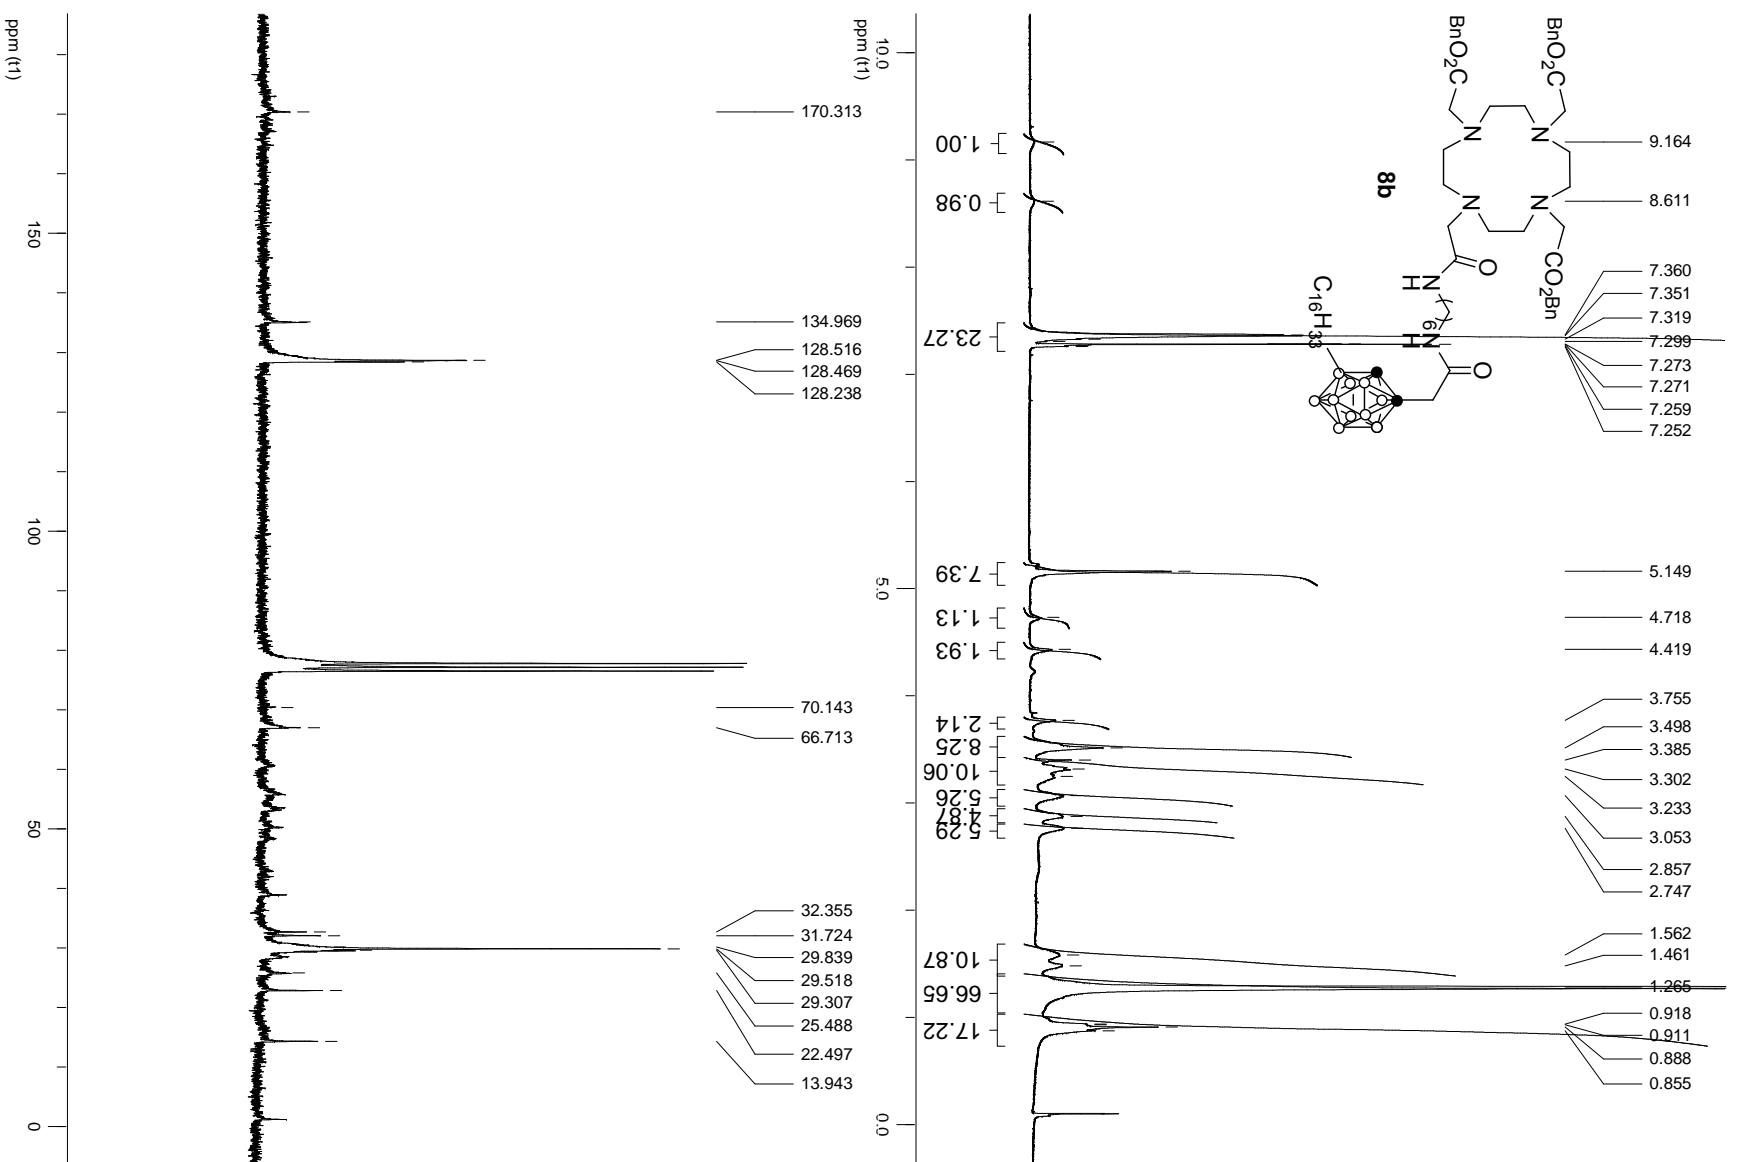

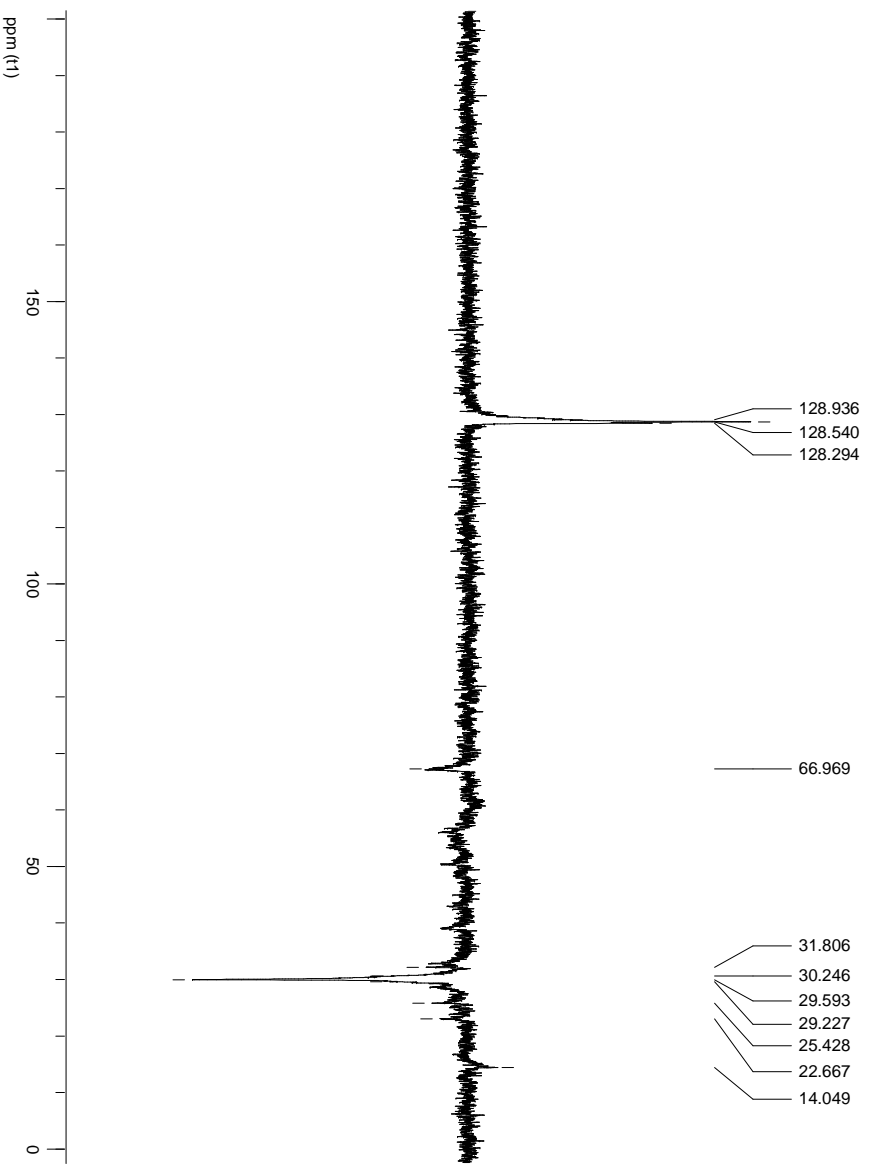

**Figure 10**  $^1\text{H}$ ,  $^{13}\text{C}$ , DEPT of C-[DOTAMA- $\text{C}_6$ ]-acetamido- $\text{C}'\text{-H-4}$ -(hexadecyl)- $o$ -carborane (**9a**)

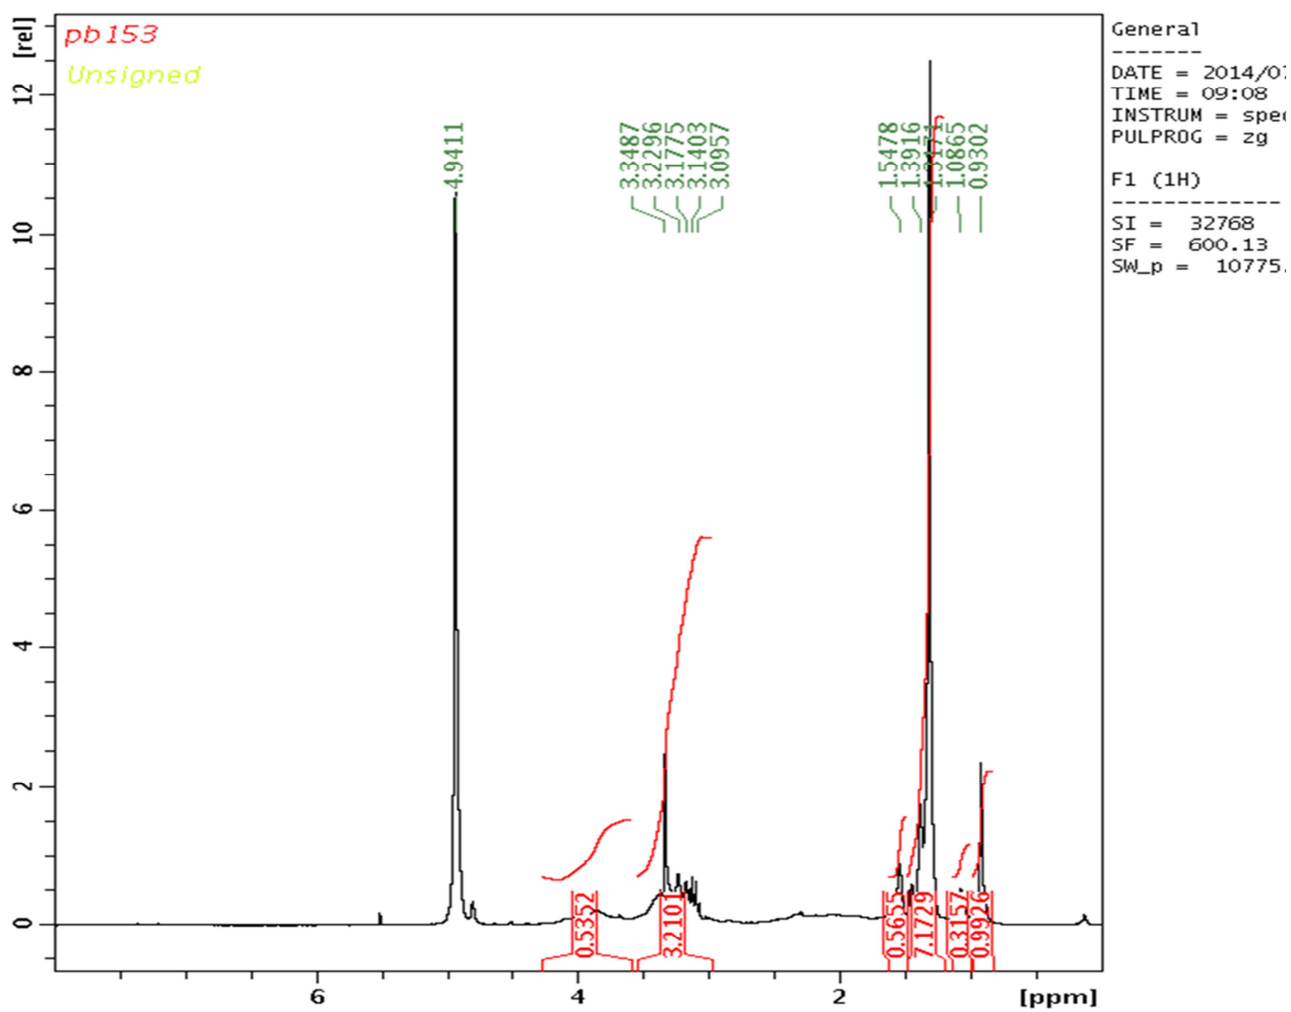

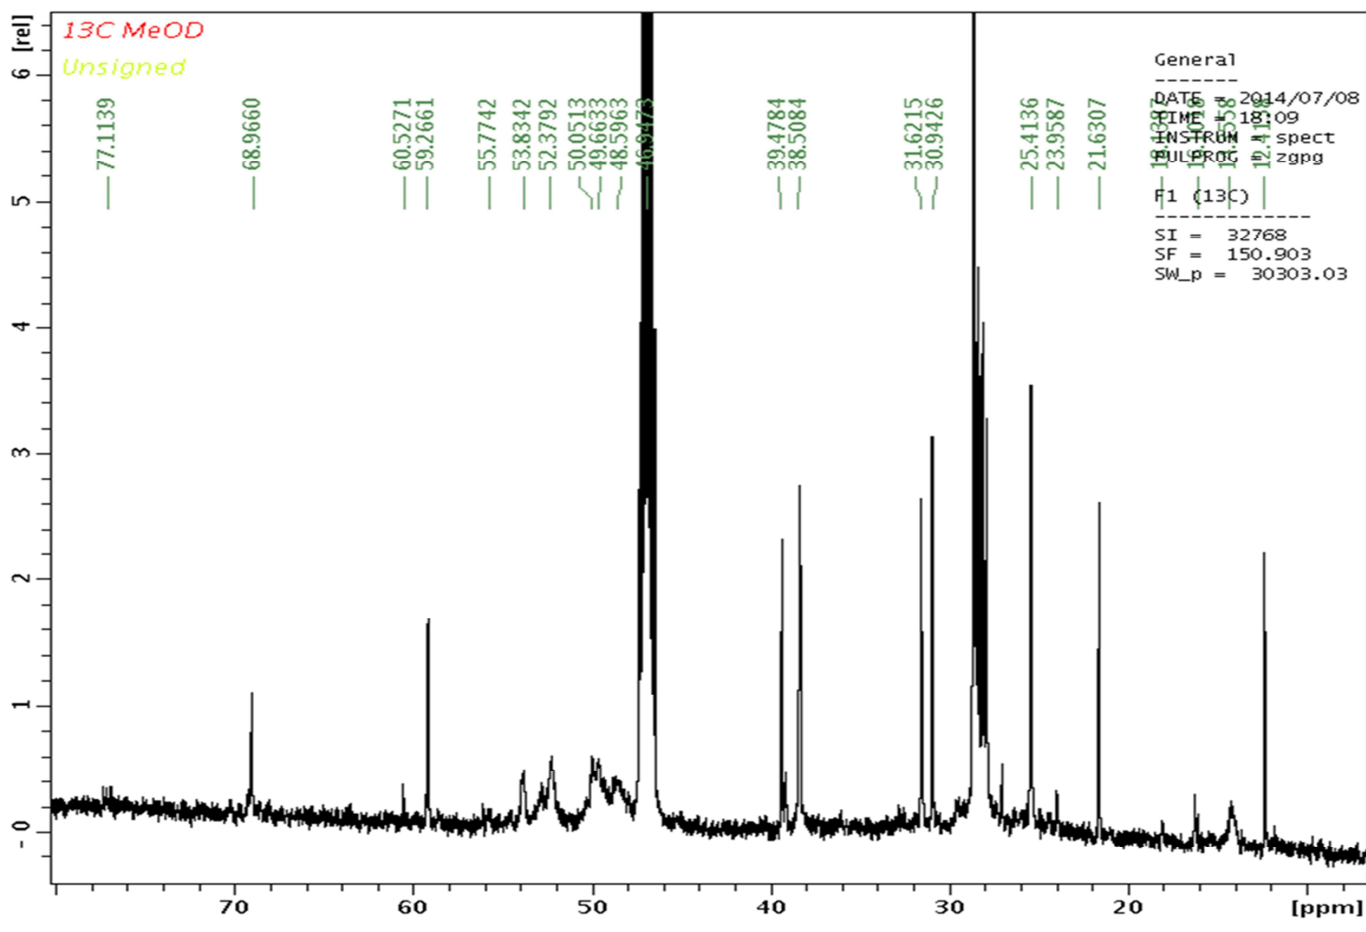

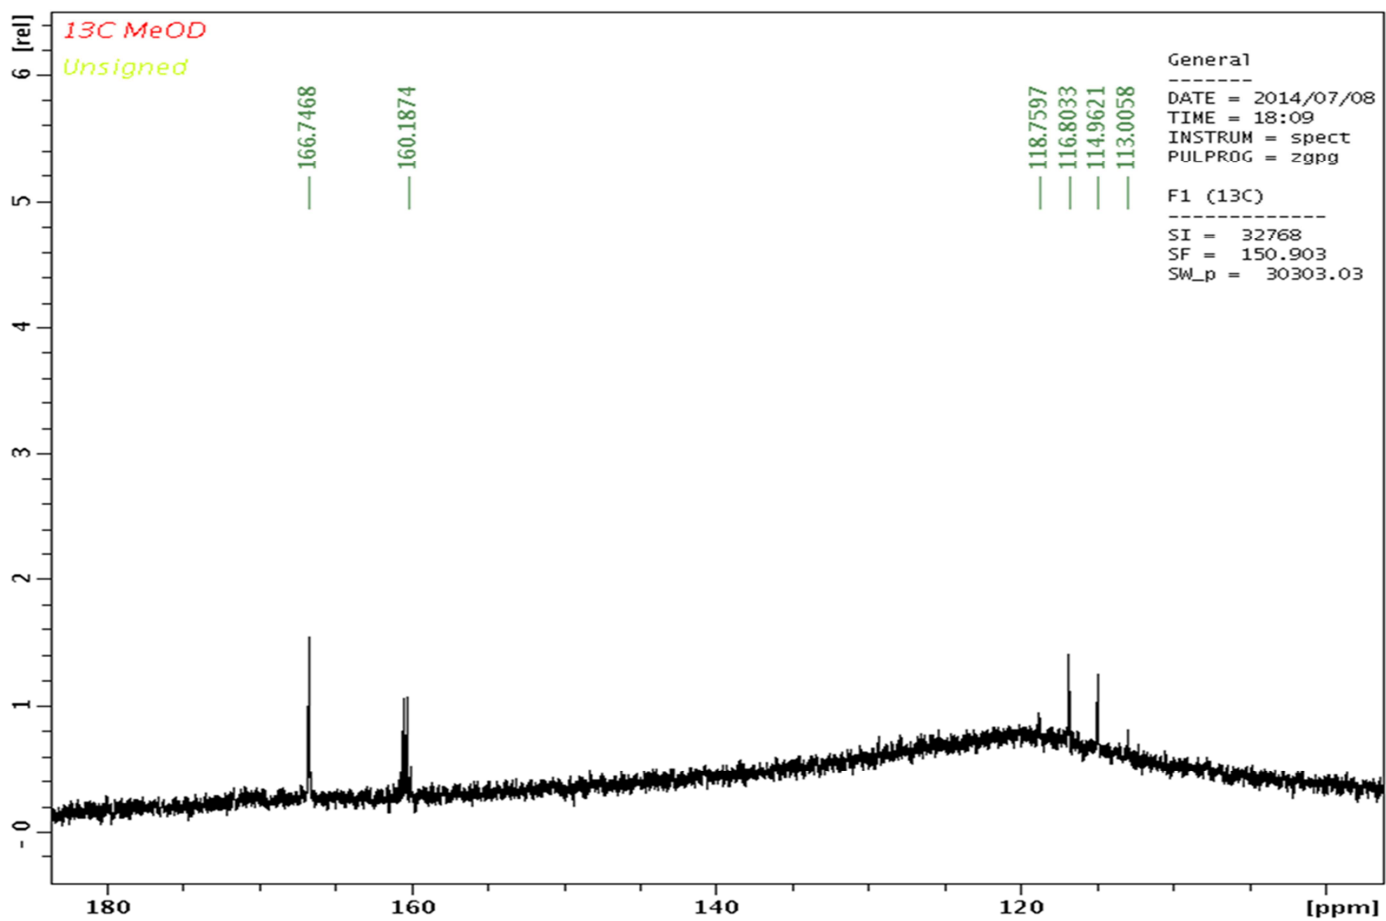

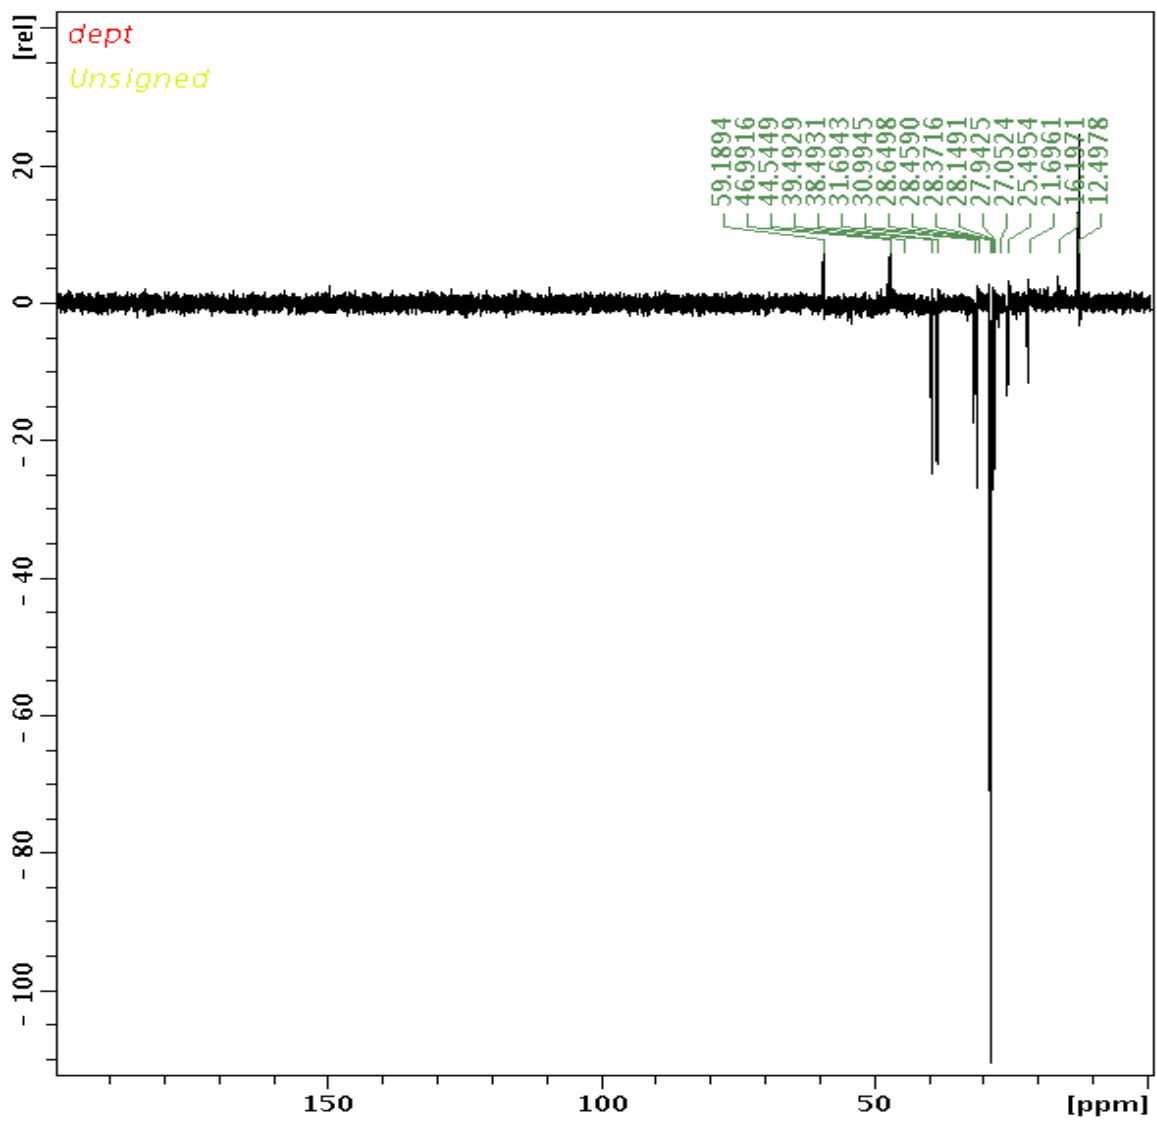

General  
 -----  
 DATE = 2014/07/09  
 TIME = 11:29  
 INSTRUM = spect  
 PULPROG = dept  
 -----  
 F1 (13C)  
 -----  
 SI = 32768  
 SF = 150.903  
 SW\_p = 30303.03

**Figure 11**  $^1\text{H}$ ,  $^{13}\text{C}$ , DEPT of C-[DOTAMA- $\text{C}_6$ ]-acetamido- $\text{C}'\text{-H-9}$ -(hexadecyl)- $o$ -carborane (**9b**)

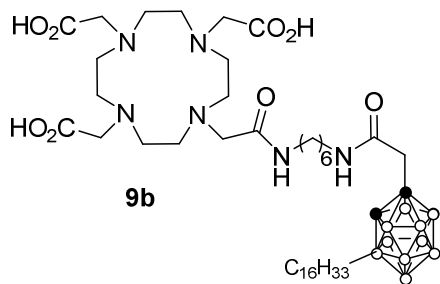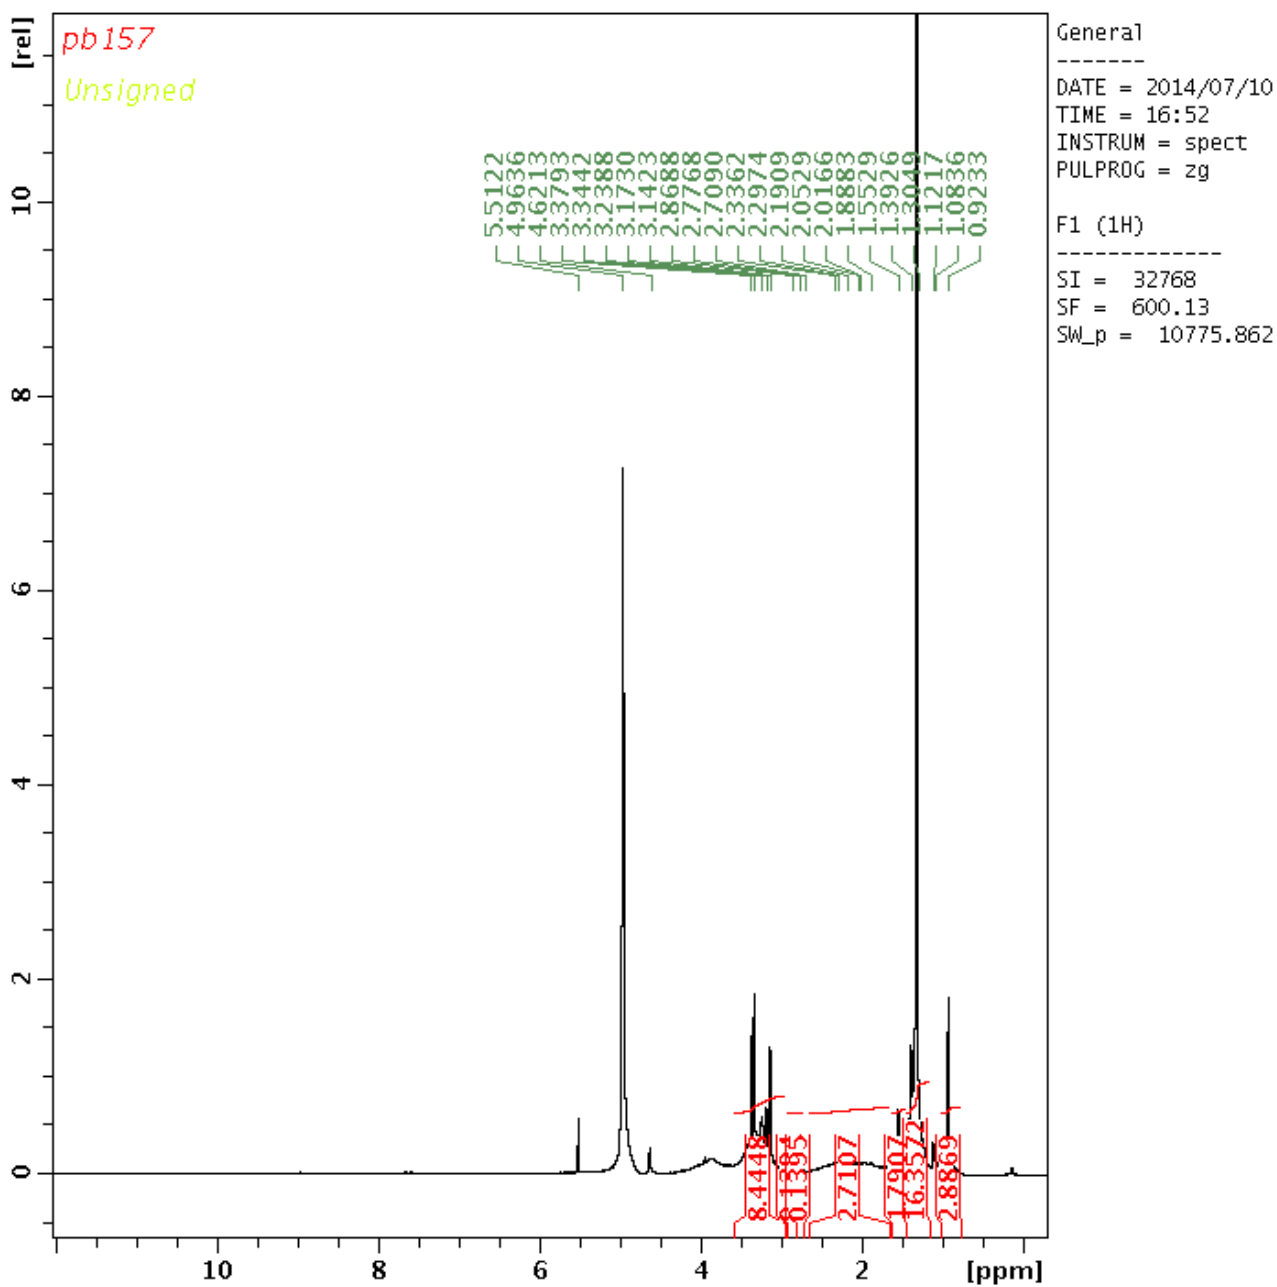



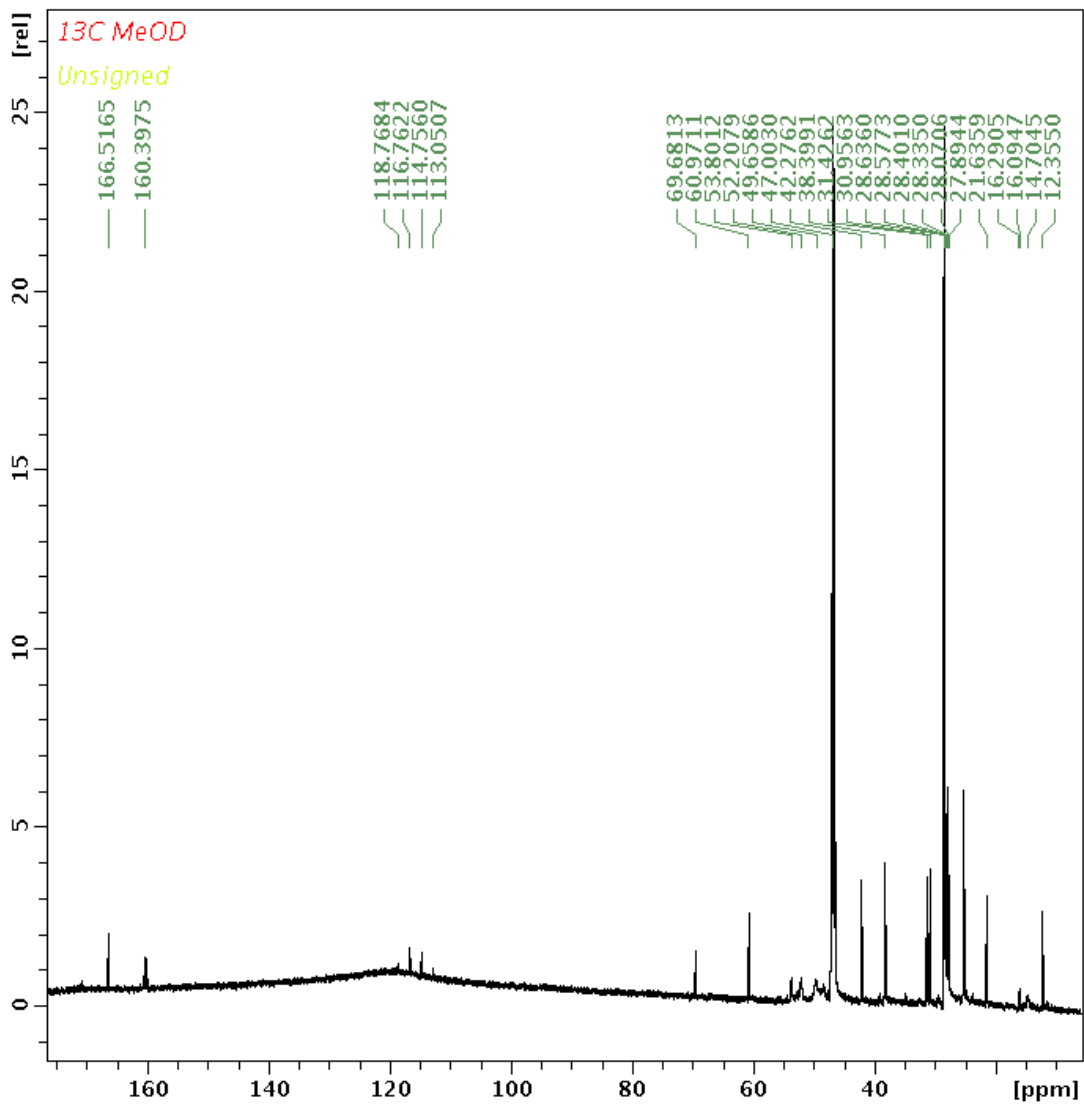

General  
-----  
DATE = 2014/07/09  
TIME = 16:27  
INSTRUM = spect  
PULPROG = zgpg  
  
F1 (13C)  
-----  
SI = 32768  
SF = 150.903  
SW\_p = 30303.03

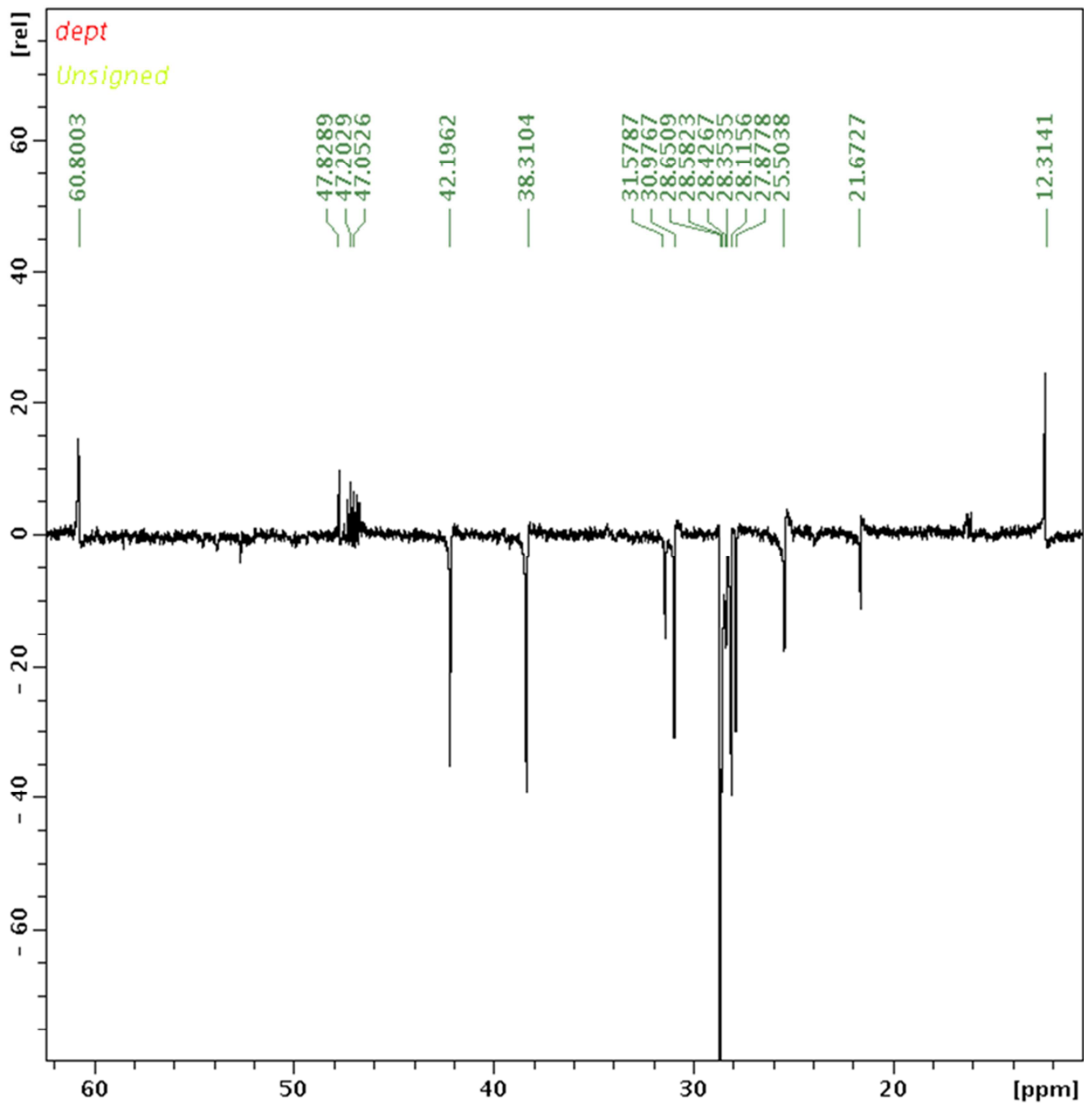

General  
 -----  
 DATE = 2014/07/10  
 TIME = 16:55  
 INSTRUM = spect  
 PULPROG = dept  
 -----  
 F1 (13C)  
 -----  
 SI = 32768  
 SF = 150.903  
 SW\_p = 30303.03

**Figure 12** Effect of HP $\beta$ CD concentration on the  $R_{1\text{obs}}$  values (21,5 MHz) for PB01a and PB01b

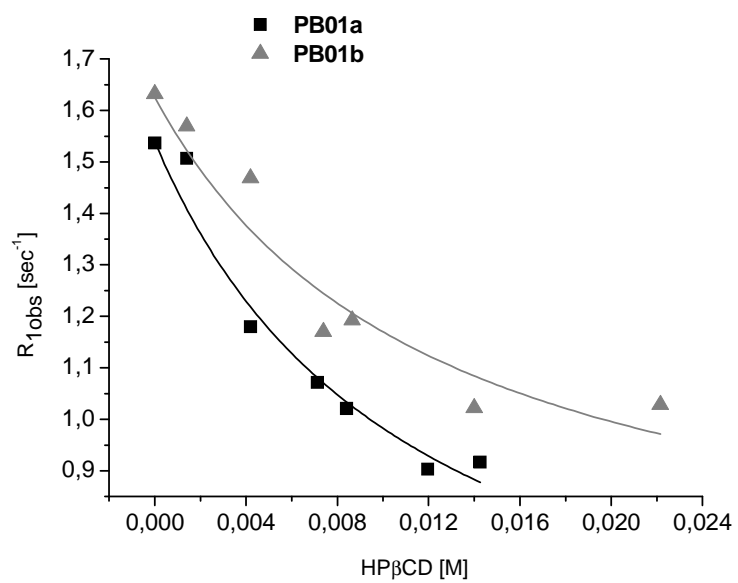

**Figure 13** Determination of the Critical Micellar Concentration (CMC) of PB01a and PB01b by measuring the longitudinal water proton relaxation rates ( $R_{1\text{ obs}}$ ) of solutions containing decreasing amounts of complex.

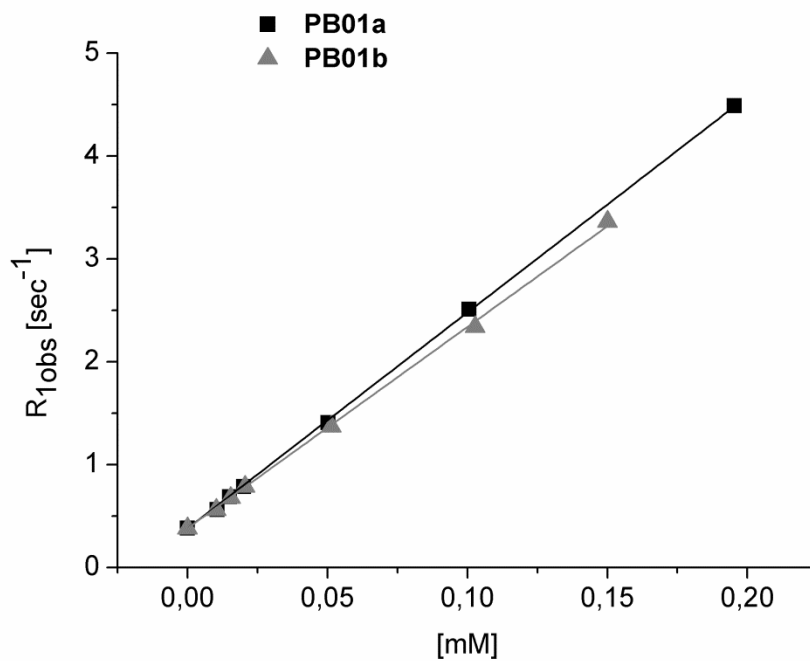

Supplement: c4ob02291b1.pdf [file c4ob02291b1.pdf]
